## **SOX transcription factors direct TCF-independent WNT/beta-catenin transcription.**

Shreyasi Mukherjee<sup>1,3</sup>, David M. Luedeke<sup>1</sup>, Leslie Brown<sup>1</sup>, and Aaron M. Zorn<sup>1,2, #</sup>

<sup>1</sup>: Center for Stem Cell and Organoid Medicine (CuSTOM), Division of Developmental Biology, Perinatal Institute, Cincinnati Children's Hospital Medical Center, Cincinnati, OH, USA

<sup>2</sup>: University of Cincinnati Department of Pediatrics, College of Medicine, Cincinnati, OH, USA

<sup>3</sup>: Molecular and Developmental Biology Graduate Program, University of Cincinnati, College of Medicine, Cincinnati, OH, USA

#correspondence: [aaron.zorn@cchmc.org](mailto:aaron.zorn@cchmc.org)

1 **ABSTRACT:**

2 WNT/ $\beta$ -catenin signaling regulates gene expression across numerous biological contexts  
3 including development, stem cell homeostasis and tissue regeneration, and dysregulation of this  
4 pathway has been implicated in many diseases including cancer. One fundamental question is  
5 how distinct WNT target genes are activated in a context-specific manner, given the dogma that  
6 most, if not all, WNT/ $\beta$ -catenin responsive transcription is mediated by TCF/LEF transcription  
7 factors (TFs) that have similar DNA-binding specificities. Here we show that the SOX family of  
8 TFs direct lineage-specific WNT/ $\beta$ -catenin responsive transcription during the differentiation of  
9 human pluripotent stem cells (hPSCs) into definitive endoderm (DE) and neuromesodermal  
10 progenitors (NMPs). Using time-resolved multi-omics analyses, we show that  $\beta$ -catenin  
11 association with chromatin is highly dynamic, colocalizing with distinct TCFs and/or SOX TFs at  
12 distinct stages of differentiation, indicating both cooperative and competitive modes of genomic  
13 interactions. We demonstrate that SOX17 and SOX2 are required to recruit  $\beta$ -catenin to hundreds  
14 of lineage-specific WNT-responsive enhancers, many of which are not occupied by TCFs. At a  
15 subset of these TCF-independent enhancers, SOX TFs are required to both establish a  
16 permissive chromatin landscape and recruit a WNT-enhanceosome complex that includes  $\beta$ -  
17 catenin, BCL9, PYGO and transcriptional coactivators to direct SOX/ $\beta$ -catenin-dependent  
18 transcription. Given that SOX TFs are expressed in almost every cell type, these results have  
19 broad mechanistic implications for the specificity of WNT responses across many developmental  
20 and disease contexts.

21  
22  
23  
24  
25  
26  
27  
28  
29  
30  
31  
32  
33  
34  
35  
36  
37  
38

## 39 INTRODUCTION:

40

41 WNT/ $\beta$ -catenin signaling is used reiteratively in all metazoans with critical roles throughout  
42 the life of an organism ranging from cell-fate determination in embryogenesis, organogenesis and  
43 tissue regeneration to adult stem-cell homeostasis<sup>1</sup>. Dysregulation of the WNT pathway is  
44 associated with a range of human diseases, from cancer to neurodegeneration<sup>2</sup>. Despite being  
45 the subject of intense study for decades, how the WNT pathway executes its context-dependent  
46 roles through the selective transcription of distinct context-specific target genes remains poorly  
47 understood<sup>3,4</sup>.

48 In the canonical WNT pathway, recruitment of  $\beta$ -catenin (CTNNB1) to enhancers is the  
49 key event initiating transcription<sup>5-7</sup>. In cells not receiving a WNT signal, cytosolic  $\beta$ -catenin is  
50 phosphorylated by glycogen synthase kinase (GSK3 $\beta$ ) and targeted to a proteosomal degradation  
51 complex. The binding of WNT ligands to FZD/LRP receptors on the cell surface leads to the  
52 inactivation of the destruction complex, allowing non-phosphorylated  $\beta$ -catenin to accumulate and  
53 localize to the nucleus. Upon its translocation to the nucleus,  $\beta$ -catenin associates with DNA-  
54 binding TCF/LEF (hereafter TCF) transcription factors (TFs), where it is thought to displace,  
55 and/or lead to the inactivation of, TLE/Groucho co-repressors resulting in the transcription of WNT  
56 target genes<sup>3,8</sup>. Recent studies have provided a more integrated view of this transcription  
57 complex, known as the “WNT-enhanceosome”, that is assembled on WNT responsive enhancers  
58 (WREs).  $\beta$ -catenin/TCF on chromatin interact with several cofactors including: BCL9, PYGOPUS,  
59 CHIP/LDB/SSDP and the BAF complex. Current models propose that upon WNT signaling,  
60 recruitment of  $\beta$ -catenin results in a conformational change in the WNT-enhanceosome and an  
61 association of WREs with their cognate promoters, recruitment of histone acetyltransferases  
62 (Ep300/CBP), activation of RNA polymerase II and transcription initiation<sup>9-11</sup>. Yet, how  $\beta$ -catenin  
63 is recruited to distinct WREs in different cellular contexts remains a mystery. One of the major  
64 challenges is that  $\beta$ -catenin itself cannot bind DNA and is dependent on interactions with DNA-  
65 binding TFs for its recruitment to WREs<sup>5</sup>.

66 Decades of research indicate that the TCF family of HMG-box TFs are core mediators of  
67 WNT-responsive transcription by physically interacting with  $\beta$ -catenin and recruiting it to WREs.  
68 There are four mammalian TCFs: TCF7, TCF7L1, TCF7L2 and LEF1<sup>12</sup> that *in vitro* all bind as  
69 monomers to nearly identical 5'-SATCAAGS-3' DNA-sequences<sup>13</sup>. Genetic studies indicate that  
70 different TCFs have largely redundant functions<sup>14,15</sup> and ChIP-Seq datasets show that they co-  
71 occupy many of the same chromatin loci *in vivo*<sup>16,17</sup>. A few mechanisms have been proposed to

72 account for some degree of variability in DNA-binding, such as alternative RNA-splicing variants  
73 of TCF<sup>18</sup>, but this is insufficient to account for the diversity of WNT target genes. Thus, it remains  
74 largely unclear how TCFs alone with very similar DNA-binding specificities can regulate the vast  
75 diversity of context specific WNT-responsive transcription. Over the years, increasing evidence  
76 has emerged that  $\beta$ -catenin can interact with other TFs in addition to TCFs, including OCT4,  
77 TBX3, HIF1 $\alpha$ , SMAD and SOX TFs<sup>19–22</sup>, however whether these can recruit  $\beta$ -catenin to context-  
78 specific enhancers throughout the genome to account for the diversity of WNT-response  
79 transcription is unclear.

80 One of the strongest candidates for an alternative TF family that could mediate Wnt-  
81 responsive transcription is the SOX family. Related to TCFs, the twenty SOX factors in humans  
82 are conserved HMG-box DNA-binding domain TFs that recognize similar but distinct variations of  
83 a core WWCAAW motif<sup>23–25</sup>. Many SOX TFs have been reported to bind to  $\beta$ -catenin *in vitro* and  
84 can antagonize or potentiate WNT-responsive transcription of an artificial TOP:flash reporter, in  
85 overexpression conditions<sup>26–34</sup>. However, relatively little is known about SOX/ $\beta$ -catenin  
86 interactions *in vivo* and the extent to which SOX TFs can modulate the specificity of WNT  
87 responsive transcription. In mouse neural progenitor cells, Sox2 can interact with  $\beta$ -cat/Lef1 to  
88 repress the well-known pro-proliferative Wnt target gene *Cyclin D1*<sup>35</sup>. Moreover, we recently  
89 showed in *Xenopus* gastrulae that Sox17 and  $\beta$ -catenin co-occupy endodermal enhancers to  
90 regulate lineage-specific gene expression<sup>27,36</sup>. However, whether Sox17 mechanistically  
91 regulates  $\beta$ -catenin chromatin association remains unclear.

92 In this study, we test the hypothesis that SOX TFs can function as lineage-specific  
93 mediators of WNT/ $\beta$ -catenin transcription during development. Using the directed differentiation  
94 of human pluripotent stem cells (hPSCs) into definitive endoderm (DE) and neuromesodermal  
95 progenitors (NMPs) and time-resolved ChIP-Seq, ATAC-Seq and RNA-Seq experiments, we  
96 show that  $\beta$ -catenin chromatin binding is highly dynamic and is associated with distinct genomic  
97 loci as differentiation proceeds. We show that  $\beta$ -catenin colocalizes with different combinations  
98 of just TCFs, TCF and SOX, or just SOX TFs, with evidence of both cooperative and competitive  
99 genomic interactions. We demonstrate that SOX17 (in DE) and SOX2 (in NMPs) are required to  
100 recruit  $\beta$ -catenin to hundreds of lineage-specific WNT-responsive enhancers, many of which are  
101 not bound by TCFs. At a subset of these TCF-independent enhancers, SOX TFs are required to  
102 both establish a permissive chromatin landscape and recruit a WNT-enhanceosome complex  
103 including  $\beta$ -catenin, BCL9, PYGO and transcriptional coactivators to direct SOX/ $\beta$ -catenin-  
104 dependent transcription. These results have important implications for how the combination of

105 TCFs and lineage-specific TFs such as the SOXs might regulate distinct transcriptional programs  
106 downstream of WNT signaling in diverse biological contexts.

107

## 108 **RESULTS:**

109

### 110 **$\beta$ -catenin binds dynamically to distinct lineage-specific enhancers during endoderm** 111 **differentiation.**

112 To characterize lineage-specific genomic recruitment of  $\beta$ -catenin during development,  
113 we performed a time course analysis of hPSCs differentiated to DE. We treated hPSCs with  
114 recombinant Activin A and the GSK3 $\beta$  inhibitor CHIR99021 to stimulate the WNT/ $\beta$ -catenin  
115 pathway for three days [Fig 1A]. This protocol mimics the NODAL and WNT signaling in the  
116 gastrula embryos and generated primitive streak-like mesendoderm cells on Day 1, endoderm  
117 progenitors on Day 2 and a highly homogenous [ $>90\%$ ] population of SOX17-expressing DE cells  
118 on Day 3 [Fig 1A, B]. Immunostaining and western blot analyses confirmed that total  $\beta$ -catenin  
119 levels and the transcriptionally active, K49-acetylated isoform of  $\beta$ -catenin<sup>37</sup> was present in the  
120 nucleus of all cells from Days 1-3 [Fig 1B and S1A, B]. We then performed chromatin  
121 immunoprecipitation coupled with high-throughput sequencing (ChIP-Seq) each day to profile  $\beta$ -  
122 catenin chromatin binding during the progressive differentiation from pluripotency to DE. In the  
123 Day 0 'WNT-OFF' pluripotency state, we detected negligible  $\beta$ -catenin binding with  $<750$  peaks,  
124 which increased upon CHIR treatment to 4501 peaks at Day1, 18608 peaks on Day2 and 11864  
125 peaks on Day3 [Fig 1C, D]. Interestingly,  $\beta$ -catenin binding was observed at distinct genomic  
126 regions on different days, suggesting that it regulated distinct transcriptional programs as lineage  
127 specification proceeded. To identify these dynamic chromatin binding patterns, we merged all  
128 significantly called peaks from all days and performed k-means clustering [Fig 1C, F-J; see  
129 Methods]. This identified five distinct patterns: common peaks shared across all time points [ $n =$   
130 1972], Day 1 enriched peaks [ $n = 1304$ ], Day 2 enriched peaks [ $n = 8364$ ], peaks specific to Days  
131 2 and 3 [ $n = 7065$ ]; and Day 3 enriched peaks [ $n = 2611$ ] [Fig 1C, F-J].

132 We next sought to identify which  $\beta$ -catenin binding events were associated with WNT-  
133 responsive transcription. We performed RNA-Seq experiments every 24 hours during the  
134 differentiation trajectory with or without WNT stimulation; cells were treated with Activin for 3 days  
135 with either a WNT agonist (CHIR99021) or a WNT antagonist (C59) [Fig S2A, see Methods].  
136 Differential expression analysis of the WNT-ON and WNT-OFF states identified WNT-responsive  
137 transcripts on each day [Fig S2B – E, see Methods]. Principal component analysis showed that

138 when WNT signaling was inhibited from the beginning, cells could not differentiate and retained  
139 a pluripotency-like transcriptional signature [Fig S2B] demonstrating that WNT is required for DE  
140 differentiation. Integrating the ChIP-Seq and RNA-Seq data confirmed that the dynamic genomic  
141 binding of  $\beta$ -catenin was indeed associated with different transcriptional programs on different  
142 days [Fig 1D]. Unsupervised hierarchical clustering of all the direct WNT activated genes  
143 associated with  $\beta$ -catenin binding across all days [Fig S2F–I] identified several distinct groups of  
144 coregulated genes similar to the dynamic  $\beta$ -catenin binding patterns. These included ‘common’  
145 WNT-responsive genes activated by CHIR irrespective of the day of differentiation [n=130] as well  
146 as genes specifically regulated by CHIR on Day 1 [n = 121], Day 2 [n = 857] and Day 3 [n = 338]  
147 [Fig S2F – I]. Gene ontology (GO) enrichment analysis [Fig S1C-G, S2F-I] revealed that  
148 “common” genes associated with  $\beta$ -catenin binding and CHIR-dependent expression at all time  
149 points included well-known universal WNT targets such as *SP5* and *AXIN2* and were associated  
150 with terms such as ‘Wnt pathway’ and ‘cell-fate specification’ [Fig S1C-G, S2F-1]. In contrast,  
151 direct  $\beta$ -catenin targets on Days 1-2 were enriched for terms related to gastrulation, mesoderm,  
152 and endoderm formation. These included primitive streak genes such as *FGF4*, *ISL1* and *EPHA4*  
153 which are expressed in both the mesoderm and endoderm. Day 3 direct targets were frequently  
154 associated with genes expressed in mature epithelium such as *CTNND1* [Fig 1F-J, S2I].  
155 Therefore, progressive DE specification is associated with rapid and dynamic  $\beta$ -catenin  
156 relocalization to distinct lineage-specific genomic loci.

157

### 158 **Changes in chromatin accessibility is not sufficient to account for dynamic $\beta$ -catenin** 159 **binding**

160 One possible explanation for the dynamic binding of  $\beta$ -catenin to distinct genomic loci was  
161 changes in the underlying chromatin accessibility landscape.<sup>38</sup> For example, Day 1 specific  $\beta$ -  
162 catenin bound loci may only be accessible on Day 1 but compacted into nucleosomes on Days  
163 2-3. To test this hypothesis, we performed time-course ATAC-Seq experiments every 24 hours  
164 during differentiation and compared this with  $\beta$ -catenin binding [Fig 1K-O; Fig S1H - V]. This  
165 revealed that although newly gained  $\beta$ -catenin binding sites were associated with increased  
166 chromatin accessibility at lineage-specific loci [Fig 1K-O, Fig S1M-Q], in general, most  $\beta$ -catenin-  
167 bound loci were accessible at all days of differentiation [Fig S1 R-V]. This was particularly  
168 exemplified in peaks enriched specifically at Days 1 and 2, where  $\beta$ -catenin binding was rapidly  
169 lost as differentiation proceeded despite the fact that most of the chromatin remained accessible;  
170 >60% on Day 2 and > 40% on Day 3 [Fig S1 N,S]. Altogether, this time-resolved genomic analyses

171 of  $\beta$ -catenin occupancy indicates that lineage-specific WNT responsive transcription is mediated  
172 by rapid  $\beta$ -catenin relocalization, highlighting further the need to understand the role of TFs in  
173 mediating this recruitment.

174

175 **SOX17 and  $\beta$ -catenin co-occupy an increasing number of genomic sites during**  
176 **endoderm differentiation.**

177 Next, we sought to understand the extent to which dynamic localization of  $\beta$ -catenin to  
178 different genomic regions over time could be explained by TCFs or SOX17, the main SOX TF  
179 regulating endoderm development. Examination of the RNA-seq data showed that all four  
180 TCF/LEFs were expressed during DE differentiation [Fig 2A]. Consistent with previous studies<sup>39–</sup>  
181 <sup>41</sup>, *TCF7L1* and *TCF7L2* were the most highly expressed TCFs in pluripotent cells, whereas *TCF7*  
182 and *LEF1* were not expressed in pluripotent cells but activated in response to WNT during  
183 differentiation. We performed ChIP-Seq experiments every 24 hours to profile the binding  
184 dynamics of all four TCFs and SOX17 during DE differentiation and compared this to  $\beta$ -catenin  
185 occupancy. Peak overlap analysis revealed that 96% of  $\beta$ -catenin binding events [ $n = 4328/4501$ ]  
186 in Day 1 cells could be accounted for by occupancy of at least one TCF, consistent with the  
187 concept of TCFs as predominant mediators of  $\beta$ -catenin binding [Fig 2B].

188 Surprisingly however, as differentiation progressed, we observed a progressive shift in co-  
189 localization of  $\beta$ -catenin from TCFs to SOX17. In Day 2 cells, TCFs colocalized with  $\beta$ -catenin at  
190 87% [ $n = 16272/18608$ ] of genomic loci, and by Day 3, TCFs accounted for only 57% of  $\beta$ -catenin  
191 binding [ $n = 6731/11864$ ] [Fig 2B-D, F, Fig S3A-F]. In contrast, the number of loci co-occupied by  
192  $\beta$ -catenin and SOX17 increased from 16% at Day 1 to 43% at Day 2 and 83% in Day3 DE cells  
193 [Fig 2B-D, F, Fig S3A-F]. Focusing on Day 3 DE, we identified four categories of peaks [Fig 2E,  
194 F]: those co-occupied only by  $\beta$ -catenin and SOX17 but not TCFs such as that associated with  
195 *BMP4* [ $n = 4224/11717$ , 36%], loci bound by  $\beta$ -catenin/SOX17/TCF such as *TBX3* [ $n =$   
196  $5544/11717$ , 47%], loci co-bound by  $\beta$ -catenin and at least one TCF, but not bound by SOX17  
197 including *LHX8* [ $n = 1187/11717$ , 10%] and  $\beta$ -catenin binding events where we could not detect  
198 co-binding of either TCFs or SOX17 [ $n = 762/11717$ , 7%] [Fig 2E-I]. *De-novo* motif analysis  
199 revealed, as expected for DE enhancers<sup>42</sup>, an enrichment of GATA, FOXA and SOX DNA-binding  
200 motifs across all Day 3 peak categories [Fig S3G]. Time-resolved analyses of TCF and SOX motif  
201 enrichment in the different categories showed an increase of SOX motifs relative to TCF DNA  
202 binding sites that correlated with increased SOX17/ $\beta$ -catenin co-occupancy [Fig 2J – M]. These  
203 data argue that TCFs alone cannot account for the total extent of  $\beta$ -catenin recruitment to

204 chromatin during progressive differentiation and indicate that DE-specific  $\beta$ -catenin binding  
205 events are correlated with co-occupancy of SOX17 or SOX17 and TCFs.

206

### 207 **SOX17 is required to recruit $\beta$ -catenin to DE specific WNT-responsive enhancers.**

208 We next assessed whether SOX17 was required to recruit  $\beta$ -catenin to chromatin,  
209 particularly in genomic regions not co-occupied by TCFs. To test this, we generated a CRISPR-  
210 mediated SOX17-null mutant iPSC line [Fig S4A] and asked whether recruitment of  $\beta$ -catenin to  
211 DE-specific genomic loci was compromised. Immunostaining and western blots confirmed a loss  
212 of SOX17 and showed that total and nuclear  $\beta$ -catenin protein levels were unaltered in SOX17  
213 knockout (KO) cells [Fig S4 B, C]. Similarly, loss of SOX17 did not affect mRNA or protein levels  
214 of TCF7, TCF7L1 or TCF7L2, however, LEF1 was upregulated [Fig S4 D-F]. Immunostaining for  
215 FOXA2 as well as RNA-Seq analysis confirmed that DE specification was compromised in  
216 SOX17KO cells [Fig S4B, G - K].

217 We next performed  $\beta$ -catenin ChIP-Seq on Day 3 wildtype [WT] and SOX17KO cells,  
218 identifying 13,131 peaks bound by  $\beta$ -catenin in WT cells as opposed to 41,058  $\beta$ -catenin peaks  
219 in SOX17KO cells. Differential binding analysis revealed three distinct categories of  $\beta$ -catenin  
220 binding: i)  $\beta$ -catenin peaks lost in SOX17KO such as that associated with *BMP7* [n = 4337], ii)  $\beta$ -  
221 catenin peaks largely unchanged in WT and SOX17KO like *DKK1* [n = 3894] and iii)  $\beta$ -catenin  
222 peaks gained in SOX17KO cells such as *MEOX1* [n = 20496] [Fig 3A-F, Fig S5 A-D]. We next  
223 assessed the extent to which SOX17-dependent changes in  $\beta$ -catenin binding correlated with  
224 TCF co-occupancy [Fig 3A-C] by performing ChIP-Seq for all TCFs in both WT and SOX17KO  
225 cells. We then quantified the status of SOX17 and TCF co-occupancy for each of these three  
226 groups of  $\beta$ -catenin peaks by differential occupancy analysis. This revealed that 96% [n =  
227 4136/4337] of  $\beta$ -catenin binding events lost in SOX17KO cells were co-bound by SOX17 in WT  
228 cells, with only 30% [n = 1318/4337] also being co-bound by TCFs. Thus, the majority of the  $\beta$ -  
229 catenin peaks lost in the SOX17KO cells showed no evidence of TCF co-occupancy. In contrast,  
230 65% [n = 2088/3894] of the  $\beta$ -catenin peaks that were unchanged between WT and SOX17KO  
231 were co-occupied by TCFs in WT cells and this increased to 90% TCF co-occupancy in SOX17KO  
232 cells. The striking increase in *de-novo*  $\beta$ -catenin binding events in SOX17KO cells was also  
233 associated with an increase in TCF-co-occupancy from 18% [n = 4373/24096] in WT DE to 85%  
234 [n = 20008/24096] in SOX17KO cells as exemplified by the mesoderm-specific gene *MEOX1* [Fig  
235 3C, F]. Interestingly, GO enrichment analysis indicated that genes associated with lost  $\beta$ -catenin  
236 peaks were enriched for endoderm organogenesis, whereas genes associated with gained  $\beta$ -

237 catenin peaks were enriched for cardiac mesoderm and epithelial to mesenchymal transition [Fig.  
238 S5I]. These data indicate that in the absence of SOX17, TCFs (primarily TCF7L2 and LEF1),  
239 recruit  $\beta$ -catenin to different enhancers, many of which are associated with alternative lineages  
240 [Fig S5 G,H].

241 We next determined the extent to which these changes in  $\beta$ -catenin binding in SOX17KO  
242 cells was associated with changes in  $\beta$ -catenin/SOX17-dependent transcription. We performed  
243 RNA-Seq on Day 3 WT and SOX17KO cells [FigS4G], identifying 3232 differentially regulated  
244 transcripts. GO analysis of transcripts upregulated in SOX17KO [n = 1424] revealed enriched  
245 terms related to mesoderm whereas downregulated transcripts were enriched for endoderm  
246 differentiation terms [Fig S4H,I, Fig S6C]. Integrating the SOX17 and  $\beta$ -catenin ChIP-Seq and  
247 RNA-Seq datasets, we identified 642 genes [corresponding to 1670 peaks] that were coordinately  
248 co-occupied and coregulated by SOX17 and  $\beta$ -catenin [Fig 3G, H, Fig S6A, B]. Epigenetic  
249 analysis showed that these SOX17/ $\beta$ -catenin cobound peaks were enriched for H3K4me1 and  
250 H3K27ac, histone marks indicative of poised and active enhancers [Fig S6D]<sup>43,44</sup>. Further analysis  
251 revealed that SOX17/ $\beta$ -catenin co-activated genes had almost exclusively endoderm enriched  
252 expression, whereas a substantial number of the SOX17/ $\beta$ -catenin repressed and SOX17  
253 repressed/ $\beta$ -catenin activated genes were enriched in mesectodermal lineages [Fig S6C]. This  
254 was consistent with our recent finding in *Xenopus* gastrulae where Sox17 promotes endoderm  
255 fate while repressing mesectoderm identity<sup>36</sup>. Next, we investigated the extent to which these  
256 SOX17/ $\beta$ -catenin coregulated and co-occupied enhancers were bound by TCFs. This revealed  
257 that 41% of SOX17/ $\beta$ -catenin coregulated enhancers had little to no evidence of TCF binding [Fig  
258 3I, J, Fig S6E].

259 Together these data demonstrate that SOX17 is required to recruit  $\beta$ -catenin to a subset  
260 endoderm-specific WNT-responsive enhancers, many of which have no evidence of TCF binding.  
261 Loss of SOX17 leads to widespread relocalization of  $\beta$ -catenin genomic binding, in many cases  
262 recruitment to mesodermal enhancers by TCFs, suggesting that SOX17 and TCFs might compete  
263 to recruit  $\beta$ -catenin to different lineage-specific loci [Fig S6F].

264

### 265 **SOX17 is required to establish a permissive chromatin landscape at a subset of TCF-** 266 **independent endodermal enhancers.**

267 There is evidence that SOX TFs can act as pioneering factors by directly engaging  
268 nucleosomes to regulate chromatin accessibility<sup>45-48</sup>, which might explain in part the loss of  $\beta$ -  
269 catenin binding in SOX17KO cells. To address this possibility, we performed ATAC-Seq

270 experiments in Day 3 WT and SOX17KO cells. Differential peak analysis revealed 13737 genomic  
271 regions with significantly increased accessibility based on ATAC-seq and 29580 regions that were  
272 significantly less accessible in SOX17KO cells [Fig S7A]. We focused our analysis on those  
273 enhancers that lost  $\beta$ -catenin binding in SOX17KO cells and that were enriched for SOX17 but  
274 not TCF occupancy; we termed these ‘TCF-independent’ enhancers [Fig 4]. About half of the  
275 TCF-independent enhancers [52%, n = 1577/3020] displayed decreased chromatin accessibility  
276 in SOX17KO cells such as *SALL1* [termed as Class I enhancers] while the others did not display  
277 significant SOX17-dependent changes in accessibility like *PRIMA1* [termed as Class II  
278 enhancers] [Fig 4A, F]. We used the Nucleoatoc package<sup>49</sup> to predict nucleosome occupancy at  
279 both classes of enhancers. We observed a similar dip in nucleosome occupancy at the ATAC-  
280 seq peak centers of both Class I and Class II enhancers in WT cells, but in SOX17KO cells, there  
281 was a significant increase in nucleosome occupancy in Class I relative to Class II enhancers,  
282 confirming that SOX17 is required to establish chromatin accessibility at about half of the TCF-  
283 independent enhancers [Fig 4B, C].

284 We next investigated whether SOX17 was required for the deposition of the histone mark  
285 H3K27ac, a signature of transcriptionally active enhancers<sup>50</sup>. H3K27ac ChIP-Seq of Day 3 WT  
286 and SOX17KO cells showed a significant loss of H3K27ac deposition in SOX17KO cells at both  
287 Class I and Class II enhancers, albeit to a lesser extent on Class II [Fig 4D, E]. Consistent with  
288 this, analysis of gene expression associated with Class I and Class II enhancers revealed that  
289 they were coregulated by both SOX17 and  $\beta$ -catenin to a similar extent [Fig 4G, Fig S7B],  
290 suggesting that loss of chromatin accessibility alone is not sufficient to account for the failure to  
291 activate these Wnt-responsive enhancers.

292 A similar analysis of peaks with unchanged  $\beta$ -catenin binding in WT and SOX17KO  
293 showed little, if any, changes in chromatin accessibility or SOX17-dependent H3K27ac deposition  
294 [Fig S7C – G]. In contrast, of the loci that gained *de-novo*  $\beta$ -catenin and TCF binding in SOX17KO  
295 cells, 59% [n = 14291/24096] exhibited an open chromatin signature in SOX17KO cells. Of these,  
296 67% [n = 7908/14291] exhibited significantly increased chromatin accessibility in SOX17KO  
297 whereas the rest were unchanged [Fig S7H - J]. In both cases there was elevated H3K27ac  
298 deposition at these loci in the absence of SOX17, [Fig S7K, L] consistent with activation of a  
299 mesoderm transcriptional program.

300 Collectively, these results indicate that SOX17 can regulate lineage specific Wnt-  
301 responsive transcription both by regulating chromatin accessibility and by recruiting  $\beta$ -catenin to  
302 a subset of TCF-independent endoderm-specific enhancers. In addition, the data suggests that

303 upon loss of SOX17, mesoderm-specific loci become accessible [Fig S4J, K, Fig S7H-L] and that  
304 TCFs can then recruit  $\beta$ -catenin to activate alternative Wnt-responsive transcriptional programs  
305 at these WREs.

306

### 307 **Lineage-specific recruitment of $\beta$ -catenin is a general feature of SOX TFs.**

308 Next, we investigated whether other SOX TFs also had the ability to regulate  $\beta$ -catenin  
309 chromatin binding and lineage-specific WNT-responsive transcription. To test this, we used  
310 hPSC-derived bipotent neuromesodermal progenitors (NMPs) where antagonistic interactions  
311 between SOX2 and the TF TBXT control WNT-responsive cell fate decision between neural and  
312 mesoderm-derived lineages<sup>51–53</sup>. Previous ChIP-Seq analysis of mouse NMPs differentiated from  
313 ESCs has shown that SOX2 co-occupies enhancers of several NMP targets together with TBXT  
314 and  $\beta$ -catenin<sup>53</sup>.

315 To investigate SOX2/ $\beta$ -catenin interactions in NMPs, we used a CRISPRi SOX2 iPSC line  
316 where deactivated Cas9 fused to the KRAB repressor domain is used to repress SOX2  
317 expression in a doxycycline-dependent manner<sup>54</sup>. Using previously published protocols<sup>55</sup>, we  
318 directed the differentiation of PSCs towards the NMP lineage through the addition of FGF8b and  
319 the WNT agonist CHIR99021<sup>55</sup>, generating relatively pure (>70%) populations of NMPs co-  
320 expressing SOX2 and TBXT after 3 days of culture [Fig 5A,B]. To knock down (KD) SOX2 levels,  
321 we treated cells with dox right after exit from pluripotency but before the onset of NMP  
322 specification [Fig 5A, see Methods]. Immunostaining confirmed loss of SOX2 in the KD cells and  
323 showed that there was no change in overall levels total or active nuclear  $\beta$ -catenin [Fig 5CB, Fig  
324 S8BG]. Moreover, we did not observe any significant difference in mRNA or protein levels of any  
325 of the TCFs in WT versus SOX2KD cells [Fig S8G, H].

326 To characterize the genomic binding of SOX2 and in  $\beta$ -catenin, we performed ChIP-Seq  
327 experiments in NMP cells. These experiments revealed that 92% [n = 5662/6137] of  $\beta$ -catenin  
328 bound genomic loci are also occupied by SOX2 [Fig5E]. We then performed  $\beta$ -catenin ChIP-Seq  
329 in WT and SOX2KD NMP cells [Fig S9A]. Differential peak analysis revealed that SOX2KD led to  
330 a significant loss of  $\beta$ -catenin binding at 4946 loci, while  $\beta$ -catenin binding was unchanged at  
331 2711 loci and only 214 new  $\beta$ -catenin peaks were gained [Fig 5C,D FigS9 A-E]. *De-novo* motif  
332 analysis revealed an enrichment of TCF DNA-binding sites in both lost and unchanged in  $\beta$ -  
333 catenin peaks, while, as expected, SOX motifs were only enriched at loci that lost  $\beta$ -catenin  
334 binding in SOX2KD cells [Fig S9F]. GO analyses of the genes associated with SOX2-dependent  
335  $\beta$ -catenin binding showed an enrichment for terms related to nervous system development, while

336 unchanged  $\beta$ -catenin peaks were enriched for terms related to mesoderm development. This is  
337 consistent with the idea that SOX2 promotes neural fate in NMPs while WNT favors mesoderm  
338 differentiation [Fig S9F].

339 To identify direct SOX2 and WNT target genes, we then performed RNA-seq on WT and  
340 SOX2KD cells as well as on cultures where CHIR was replaced with C59 to inhibit WNT signaling  
341 [Fig S8A, D; see Methods]. Differential expression analysis identified 865 SOX2 regulated and  
342 2491 WNT regulated transcripts. GO analysis showed that the 346 genes downregulated in the  
343 SOX2KD were enriched for ‘epidermis development’ and neurogenesis’ whereas the 519  
344 upregulated genes were enriched for terms related to ‘WNT signaling’ and ‘A-P axis specification’  
345 [Fig S8B, C]. WNT regulated genes had a similar but opposite functional annotation with CHIR  
346 activated genes being enriched for ‘A/P axis specification’ and ‘mesoderm development’, while  
347 WNT repressed gene were enriched for terms associated with nervous system development [Fig  
348 S8E, F]. Integrating the ChIP-seq and RNA-seq data identified 209 enhancers, corresponding to  
349 119 genes that were coordinately co-occupied and coregulated by SOX2 and  $\beta$ -catenin [Fig 5E.  
350 S8I]. Consistent with an antagonistic relationship between SOX2 and WNT/ $\beta$ -catenin, 42% of co-  
351 occupied and coregulated genes [50/119] were SOX2 repressed but WNT activated whereas 29%  
352 [34/119] were SOX2 activated and WNT repressed [Fig S8J].

353 Next, we evaluated TCF occupancy of the SOX2/ $\beta$ -catenin co-bound loci by ChIP-seq for  
354 TCF7L1 and LEF1, the two TCFs most highly expressed in NMPs. We found that 50%  
355 [2483/4946] of the loci that lost  $\beta$ -catenin peaks in SOX2KD cells were also co-occupied by TCFs  
356 like those associated with *MESP1*, while the other half had no evidence of TCF7L1 or LEF1  
357 binding such as *TSHZ3* [Fig 5C-D, J; Fig S9 D – E.]. We then assessed chromatin accessibility  
358 at loci with SOX2-dependent  $\beta$ -catenin binding by ATAC-Seq of WT and SOX2KD NMPs.  
359 Surprisingly, we did not observe appreciable differences in ATAC-seq signal at loci that had  
360 SOX2-dependent  $\beta$ -catenin binding with the majority of these loci being accessible in both WT  
361 and SOX2KD cells [Fig S9G].

362 Collectively, our genomic analysis of SOX2/ $\beta$ -catenin in NMPs and SOX17/ $\beta$ -catenin in  
363 DE demonstrate that SOX TFs are required to regulate  $\beta$ -catenin recruitment and lineage-specific  
364 WNT responsive transcription. In some cases, SOXs co-occupy WREs with TCFs, in other cases  
365 SOXs appear to recruit  $\beta$ -catenin independent of TCFs.

366

367 **SOX17 assembles a WNT-responsive transcription complex at TCF-independent**  
368 **enhancers.**

369 To understand how SOX17 and  $\beta$ -catenin activate transcription, we focused on a subset  
370 of SOX17/ $\beta$ -catenin regulated TCF-independent enhancers. We tested a -60kb *CXCR4* and a -  
371 33kb *BMP7* enhancer; both these genes were coregulated and co-occupied by SOX17 and  $\beta$ -  
372 catenin, but had little evidence of TCF occupancy. DNA sequence analysis confirmed that both  
373 these putative enhancers had several SOX17 but no TCF binding sites [see Methods,  
374 Supplementary Table 4]. We termed this category of enhancers as ‘SOX-dependent’. Moreover,  
375 *CXCR4* is a well-established DE marker co-expressing with SOX17 in both the developing mouse  
376 endoderm and in human DE cultures<sup>56,57</sup>. Interestingly, *BMP7* has been implicated as direct  
377 SOX17 target during germ-cell differentiation, supporting a similar relationship in DE<sup>58</sup>. As  
378 controls, we also assessed exemplar ‘universal’ WREs corresponding to *SP5*<sup>59</sup> and *NKD1*<sup>60</sup>, that  
379 are activated through canonical  $\beta$ -catenin/TCF interactions. We termed this category of  
380 enhancers as ‘TCF-dependent’. We cloned each of these enhancers into luciferase reporter  
381 constructs and also generated versions where the putative SOX17 DNA-binding sites or TCF sites  
382 were mutated ( $\Delta$ SOX and  $\Delta$ TCF respectively). We then transfected the WT or mutant enhancers  
383 into PSCs differentiated into WT DE, SOX17KO Day 3 cultures (-SOX17) or Day 3 cultures where  
384  $\beta$ -catenin activity was inhibited by removal of CHIR and addition of C59 (-WNT). The *CXCR4* and  
385 *BMP7* enhancers were both robustly active in WT DE and demonstrated significantly decreased  
386 activity upon addition of the C59 (-WNT) or in SOX17KO (-SOX17) cells. Moreover, mutation of  
387 the SOX17 DNA-binding sites dramatically reduced enhancer activity [Fig 6A].

388 In WT DE, the *SP5* enhancer displayed robust activity, and this was not altered in  
389 SOX17KO cells. Motif analysis showed evidence of multiple TCF as well as SOX17 binding sites.  
390 Mutating the SOX17 sites did not affect enhancer activity, while as expected, mutating TCF sites  
391 led to a significant loss of reporter activity [Fig 6B]. This is consistent with the regulation of  
392 endogenous *SP5* [Fig. 1, 3]. In contrast, *NKD1* is an example of a gene activated by WNT but  
393 repressed by SOX17. Accordingly, the ‘wild-type’ *NKD1* enhancer had minimal transcriptional  
394 activity in WT DE cells, but was activated in SOX17KO cells, or by mutating SOX17 sites. On the  
395 other hand, mutating TCF sites led to decreased *NKD1* reporter activity [Fig 6B]. Together, these  
396 data demonstrate that TCF-independent SOX17/ $\beta$ -catenin-bound loci are *bona fide* WNT-  
397 responsive enhancers. Further, our experiments recapitulate distinct modes of both SOX17 and  
398 TCF occupancy and target gene regulation at distinct subsets of WREs.

399 Next, we performed reciprocal coimmunoprecipitation (coIP) experiments demonstrating  
400 that SOX17 and  $\beta$ -catenin physically interact in DE cells [Fig 6C, D]. As expected, we also  
401 observed a direct interaction between TCF7L2 and  $\beta$ -catenin in both WT and SOX17KO cells [Fig

402 S10A]. Reciprocal ChIP-reChIP experiments further confirmed that both SOX17 and  $\beta$ -catenin  
403 directly interact at these SOX-dependent but not TCF-dependent enhancers [Fig6E, FigS10 B].

404 We next tested the hypothesis that SOX-dependent WREs can serve as a scaffold for  
405 recruitment of transcriptional coactivators.  $\beta$ -catenin interacts with chromatin modifiers through  
406 its C-terminal transactivation domain including BRG1 and p300<sup>8,61,62</sup>.  $\beta$ -catenin also interacts with  
407 components of the cohesin and mediator complexes, previously shown to be critical for  
408 transactivation of TCF/ $\beta$ -catenin target genes<sup>63–65</sup>. CoIP assays demonstrated that both  $\beta$ -catenin  
409 and SOX17 interact with BRG1 and the cohesin subunit SMC1 in DE cells [Fig 6C, D]. To assess  
410 if SOX17 was required to recruit BRG1 to TCF-independent enhancers, we performed BRG1  
411 ChIP-Seq in WT and SOX17KO cells. This revealed a substantial loss of BRG1 signal in  
412 SOX17KO cells at those TCF-independent enhancers that we previously demonstrated exhibited  
413 SOX17-dependent  $\beta$ -catenin binding [Fig 4, 6F, G]. We then performed ChIP-qPCR assays in  
414 WT and SOX17KO cells for other previously known interactors of TCF/ $\beta$ -catenin transcriptional  
415 activation complexes including p300<sup>66</sup>, the cohesin subunit SMC1, the cohesin loading protein  
416 NIPBL<sup>67</sup> the mediator subunit MED12, as well as the core WNT enhanceosome components  
417 BCL9 and PYGO<sup>68–70</sup> [Fig 6H – K, FigS10 D-E]. In each case, SOX17 was required for efficient  
418 recruitment to the TCF-independent SOX17/ $\beta$ -catenin regulated DE enhancers *CXCR4* and  
419 *SALL1*. In contrast, there was no difference in occupancy of these coactivators to the TCF-  
420 dependent WREs *SP5*, *NKD1* and *CDX2* in SOX17KO cells [Fig. 6H-K, Fig S10D-E]. We did not  
421 detect any differences in expression levels of WNT enhanceosome components or transcriptional  
422 coactivators in WT and SOX17KO cells, suggesting that SOX17 is directly required to recruit  
423 these interacting partners to SOX-dependent enhancers [Fig S10C].

424 Collectively, our data suggests that SOX17 is required to recruit  $\beta$ -catenin to a subset of  
425 DE enhancers and assemble a TCF-independent transcription complex to activate lineage-  
426 specific WNT-responsive transcription [Fig 6L].

427

## 428 **DISCUSSION:**

429 **Overview.** In this study, we tested the hypothesis that the SOX family of TFs function as lineage-  
430 specific regulators of WNT responsive transcription. We showed that during hPSC-derived DE  
431 differentiation, the recruitment of  $\beta$ -catenin to lineage-specific enhancers was highly dynamic and  
432 cannot be accounted for completely by TCFs. During DE differentiation, there was an increased  
433 number of genomic loci co-occupied by  $\beta$ -catenin and SOX17. The loss of SOX17 led to  
434 widespread genomic relocalization of  $\beta$ -catenin binding, with SOX17 being required for the

435 recruitment  $\beta$ -catenin to a subset of enhancers that are WNT-responsive and SOX17-regulated,  
436 but have no evidence of TCF binding. At some of these TCF-independent enhancers, SOX17 and  
437  $\beta$ -catenin interacted with Wnt-pathway components BCL9 and PYGO as well as transcriptional  
438 coactivators p300, BRG1, MED12 and SMC1 to assemble a SOX17-dependent transcription  
439 complex. Mutating SOX17 DNA binding sites led to a loss of transcriptional activity of these  
440 enhancers. Similarly, we showed that SOX2 is also required for the chromatin recruitment of  $\beta$ -  
441 catenin to regulate lineage-specific Wnt-responsive transcription in hPSC-derived NMP cells; half  
442 of these loci also had no evidence of TCF co-occupancy. Although we have focused on the most  
443 novel cases where SOXs appear to recruit  $\beta$ -catenin independent of TCFs, in both DE and NMPs,  
444 many genomic loci are also co-occupied by SOXs, TCFs and  $\beta$ -catenin. Moreover, we observe  
445 many WNT-responsive genomic loci that retain  $\beta$ -catenin binding irrespective of SOX17 depletion,  
446 as well as a substantial proportion of loci that gain *de-novo* TCF/ $\beta$ -catenin binding upon loss of  
447 SOX17. These data suggest that the interplay between SOXs and TCFs is likely to be more  
448 complex and that both cooperative and competitive interactions between SOX and TCF TFs may  
449 regulate  $\beta$ -catenin recruitment to distinct context-specific loci.

450

451 **TCF-independent WNT-responsive transcription.** According to the current dogma,  $\beta$ -  
452 catenin/TCF interactions mediate the vast majority, if not all, of WNT responsive transcription.  
453 Indeed, in HEK293T and intestinal epithelial cells,  $\beta$ -catenin binding events almost completely  
454 overlap with TCFs, and dominant negative TCF7L2 is sufficient to diminish  $\beta$ -catenin binding at  
455 the vast majority of peaks<sup>71</sup>. While the central role of TCFs in mediating Wnt-responsive  
456 transcription is not in doubt, it is still unclear whether TCFs can account for the full diversity of  
457 Wnt-responsive transcription in different cell types, particularly during development. Indeed, a  
458 recent study showed that despite deletion of all four TCFs in HEK293T,  $\beta$ -catenin retained  
459 transcriptional activity and binding at some genomic loci.<sup>72</sup> While other TFs have anecdotally been  
460 shown to bind to  $\beta$ -catenin in various contexts (often *in vitro*) the notion that alternative TFs had  
461 a major role in mediating WNT-responsive transcription, independent of TCFs has been  
462 controversial.

463 Our systematic time-resolved genomic analyses shows that TCFs cannot account for the  
464 full extent of  $\beta$ -catenin chromatin binding during DE differentiation. While  $\beta$ -catenin binding and  
465 Wnt-responsive transcription is almost exclusively mediated by TCFs in Day 1 mesendoderm  
466 cells, SOX17 accounts for an increasing proportion of  $\beta$ -catenin binding event as DE  
467 differentiation progresses. Like SOX17, SOX2 can also regulate lineage-specific WNT responsive

468 transcription by directing  $\beta$ -catenin recruitment to lineage-specific neuromesodermal and  
469 neuronal loci. Collectively, our studies indicate that SOX TFs account for a large proportion of the  
470 genomic  $\beta$ -catenin binding in two different developmental lineages. One possibility is that  $\beta$ -  
471 catenin/TCF interactions preferentially regulate context-independent functions, such as WNT-  
472 mediated cell proliferation. In contrast, TCF-independent  $\beta$ -catenin/SOX or  $\beta$ -catenin/SOX/TCF  
473 interactions may be more prevalent during development where transcriptional programs are more  
474 dynamic. Further studies discriminating between these scenarios shall provide more insight into  
475 how specific  $\beta$ -catenin is preferentially engaged by TCF vs. non-TCF TFs.

476  
477 **SOX TFs as lineage-specific regulators of the WNT pathway.** Most, if not all SOX TFs are  
478 reported to modulate WNT responsive transcription through reporter assays (TOP:flash) in  
479 overexpression conditions<sup>28</sup>. Similar to the TCFs, the SOX TFs bind the minor groove of DNA  
480 through their HMG domains and induce a bend of 60-70°, facilitating interactions with local  
481 chromatin modifiers and transcriptional coactivators and leading to transcription initiation<sup>73</sup>. Our  
482 study highlights the role of SOX17 and SOX2 as dual-function regulators of endodermal and  
483 neuromesodermal lineages, respectively: not only are they required to activate lineage-specific  
484 GRNs, but they directly repress alternate-lineage fates.

485 Despite binding DNA through low affinity sequences, the SOX TFs demonstrate  
486 remarkable specificity in gene regulation. One attractive consideration is that they form lineage-  
487 specific regulatory complexes with homologous or heterologous partners, thereby providing  
488 specificity towards the regulation of its target genes. A classic example of the SOX ‘partner-  
489 code’<sup>74</sup> is the SOX2-OCT4 heterodimer that’s critical for maintenance of pluripotency in PSCs<sup>24</sup>,  
490 and in mouse ESCs, they can physically associate with  $\beta$ -catenin/Tcf7l1<sup>75</sup>. SOX TFs also display  
491 remarkable differences outside of the HMG domain<sup>23</sup>. Accordingly, SOX17, a SOXF group  
492 member, cannot substitute for the functions of SOX2, a member of the SOXB1 group. Mutating  
493 an acidic glutamate residue within SOX17 to lysine, however, enables it to bind to OCT, and  
494 subsequently SOX2 binding sites at pluripotency related loci<sup>76,77</sup>. In the future, it would be  
495 interesting to identify and test if SOX subgroup-specific domains outside of the HMG-box are  
496 required for selective  $\beta$ -catenin binding to lineage-specific loci.

497 Our ChIP-seq analyses show a large degree of overlap between  $\beta$ -catenin, SOX17 and  
498 GATA6/GATA4 binding events during DE differentiation. This is consistent with previous studies  
499 in *Xenopus* embryos where Sox17 and Gata4/6 coordinately regulate endoderm development<sup>27,78</sup>,  
500 as well as recent studies that GATA6 functions upstream of SOX17 and FOXA2 to pattern an

501 endoderm-specific chromatin landscape and can directly interact with SOX17<sup>79</sup>. Interestingly,  $\beta$ -  
502 catenin/TCF7L2/GATA4 and TCF7L2/GATA2/GATA1 interactions have also been reported  
503 during cardiac and erythroid lineages specification respectively<sup>80,81</sup>. It is possible that SOX17-  
504 GATA heterodimers recruit  $\beta$ -catenin to DE-specific enhancers. Future computational analyses  
505 and biochemical experiments will allow us to distinguish between monomeric and multimeric  
506 SOX17 sites and whether  $\beta$ -catenin is preferentially recruited solely by SOX17 or by a cluster of  
507 lineage-specific TFs.

508

509 **Multiple modes of interactions between SOX and TCF TFs.** Our studies reveal multiple modes  
510 of interactions between SOX and TCF TFs. In addition to TCF-independent enhancers, we identify  
511 a subset of enhancers co-occupied by SOX17 and TCFs where  $\beta$ -catenin occupancy remains  
512 unchanged in the presence and absence of SOX17. This is consistent with previous studies  
513 showing that lineage-directing TFs like SOX and signal-determining TFs like TCFs act  
514 combinatorically on tissue-specific enhancers; this is one likely mechanism directing lineage-  
515 specific Wnt-responsive transcription at a subset of genomic loci<sup>20,81</sup>. *In-vitro* protein binding  
516 assays using recombinant Sox17, Tcf7l2 and  $\beta$ -catenin have shown that they can form a trimeric  
517 complex<sup>26</sup>. Interestingly, at endogenous levels in DE cells, we could not detect a physical  
518 interaction between SOX17 and TCF7L2. Sequence analysis of enhancers co-occupied by  
519 SOX17 and TCFs show that the majority of SOX17 and TCF binding sites are >50bp away from  
520 each other. However, since they are both HMG box TFs that bend DNA, it is conceivable that  
521 despite being distant from each other on linear DNA, they might cooperatively bind  $\beta$ -catenin. On  
522 the other hand, our results show that the global increase in *de-novo*  $\beta$ -catenin/TCF binding in  
523 SOX17KO cells. These points to an interesting possibility that SOX17 and TCFs compete for  
524 recruitment of a finite amount of nuclear  $\beta$ -catenin. Future genomic and biochemical experiments  
525 with careful titration of SOX and TCF levels will be important to test this.

526

527 **The WNT/ $\beta$ -catenin enhanceosome complex.** Several studies have recently identified nuclear  
528 proteins required for the assembly of a  $\beta$ -catenin-responsive transcription complex – termed the  
529 WNT enhanceosome<sup>9,10</sup>. While components such as PYGO potentiate the transactivation of WNT  
530 target genes, BCL9 acts as a bridge to tether  $\beta$ -catenin to PYGO<sup>68,82</sup>. It's been proposed that  
531 upon WNT stimulation and recruitment of  $\beta$ -catenin to chromatin by TCFs, the WNT  
532 enhanceosome undergoes a conformational change to bring the distal enhancer in close proximity  
533 to its cognate promoter, leading to the recruitment of RNA PolII and transcriptional activation<sup>67</sup>.

534 The notion that TFs other than TCF might function to integrate the multiple components of this  
535 enhanceosome has been proposed previously<sup>11</sup>. For example, TBX3 associates with the WNT  
536 enhanceosome through interactions with BCL9<sup>22</sup> and the RUNX family of TFs can interact with  
537 the ChiLS complex<sup>9</sup>. However, the extent to which these TFs can regulate  $\beta$ -catenin genomic  
538 recruitment is unknown.

539 Our experiments show that on TCF-independent WNT responsive enhancers, SOX17 is  
540 required for the recruitment of BCL9, PYGO2, as well as transcriptional coactivators p300, BRG1,  
541 MED12 and SMC2, which physically interact with the  $\beta$ -catenin C-terminal transactivation domain.  
542 However, the hierarchy and the sequential order in which SOX17 and the WNT enhanceosome  
543 complex are assembled on DNA remains to be determined. An attractive hypothesis supported  
544 by our data is that SOX17 acts in a sequential manner to first increase the chromatin accessibility  
545 at specific enhancers, perhaps acting as a pioneer TF. This then sets the scene for SOX17 to  
546 recruit enhanceosome components like Pygopus which facilitates the loading  $\beta$ -catenin, similar  
547 to a model that's been proposed to prime  $\beta$ -catenin/TCF enhancers to respond to WNT  
548 activation<sup>9</sup>. Ultimately, elucidation of the SOX17/  $\beta$ -catenin/DNA complex structure, coupled with  
549 proteomics and biochemical assays will be critical to dissect the mechanisms assembling a  
550 SOX17/ $\beta$ -catenin transcription complex.

551 Another interesting possibility, in the context of enhancers cobound by SOX,  $\beta$ -catenin  
552 and TCF, is that SOX TFs might recruit coactivators or corepressors to potentiate or repress  
553 traditional TCF/ $\beta$ -catenin. Indeed, SOX9 is reported to enhance  $\beta$ -catenin phosphorylation and  
554 turnover in chondrocytes<sup>31,83</sup>, and in SW480 cells, SOX17 negatively regulates WNT responses<sup>26</sup>.  
555 While our results show no appreciable differences in  $\beta$ -catenin or TCF protein levels between WT  
556 and SOX17KO cells, it is possible that SOX17 instead regulates the WNT enhanceosome through  
557 multiple mechanisms including perhaps post-translational modifications of  $\beta$ -catenin, such as  
558 trimethylation or acetylation, affecting activation vs. repression<sup>37</sup>, or via chromatin modifiers such  
559 as *Kdm2a/b* to regulate stability of nuclear  $\beta$ -catenin at specific loci<sup>84</sup>. Further studies are needed  
560 to explore if and how SOX TFs recruit proteins that post translationally modify  $\beta$ -catenin at specific  
561 loci.

562 In summary, the data here establish the SOX TFs as context-dependent regulators of  
563 WNT-responsive transcription by regulating the recruitment of  $\beta$ -catenin and enhanceosome  
564 complexes to lineage-specific enhancers. Given that most, if not all cell types, express at least  
565 one of the 20 SOX TFs that are encoded in the human genome, it is likely that they have a broad,  
566 previously unappreciated role in regulating WNT responsive transcription in many contexts.

567 Indeed, there is correlative evidence of SOX TFs and  $\beta$ -catenin interactions leading to the  
568 dysregulation of WNT-responsive oncogenes in many cancers, including breast, cervical and  
569 colon cancers<sup>30,85,86</sup>. Therefore, further investigations into the mechanisms through which SOX  
570 and TCFs interact to control the genomic specificity of  $\beta$ -catenin in different cellular contexts might  
571 open up the possibility of targeting  $\beta$ -catenin-SOX interactions for therapeutic purposes.

572

573 **DATA AVAILABILITY:** Datasets generated in this study have been deposited to the Gene  
574 Expression Omnibus (GEO): GSE # pending. A description of all datasets generated in this  
575 study can be found in Supplementary Table 1.

576

577 **ACKNOWLEDGEMENTS:** We thank Keely Icardi and the CCHMC DNA Sequencing Core for  
578 help with ChIP-Seq library preparation; CCHMC Pluripotent Stem Cell Facility and Evan Brooks  
579 for help with generating the SOX17KO line. The CRISPRi-SOX2 line was a kind gift from Dr.  
580 Bruce Conklin (Gladstone Institutes, UCSF). This work was supported by NIDDK R01 DK123092  
581 and in part by NIH P30 DK078392 to A.M.Z.

582

583 **AUTHOR CONTRIBUTIONS:** S.M. and A.M.Z. designed the project, interpreted data and wrote  
584 the paper. S.M. performed all experiments and data analyses in collaboration with: D.M.L for  
585 cDNA cloning, immunofluorescence, and western blot experiments and L.B. for reporter assays.  
586 All authors provided input and approved of the final version of the paper.

587

588

589

590

591

592

593

594

595

596

597

598

599

600 **METHODS:**

601 **Cell Culture:** Human embryonic stem cell line WA01 (H1) was purchased from WiCell and  
602 induced pluripotent stem cell line iP572.3 was obtained from CCHMC Pluripotent Stem Cell  
603 Facility. The CRISPRi-SOX2 line was a kind gift from Dr. Bruce Conklin (Gladstones Institutes,  
604 UCSF). hESCs and iPSCs were maintained in feeder-free cultures. Cells were plated on hESC-  
605 qualified Matrigel (Corning; 354277) and maintained on mTESR1 (StemCell Technologies;  
606 85851) media at 37°C with 5% CO<sub>2</sub>. Media was changed daily, and cells were routinely passaged  
607 every 4 days using ReleSR (StemCell Technologies; 05872). CRISPRi-SOX2 cells were plated  
608 on vitronectin-coated (ThermoFisher; A14700) plates and maintained in Essential 8  
609 Medium(Gibco; A1517001). These lines were routinely passaged every 3-4 days using Versene  
610 (ThermoFisher; 15040066). All lines were routinely screened for differentiation and tested for  
611 mycoplasma contamination.

612

613 **Generation of SOX17KO line: gRNA Validation:** Two CRISPR/Cas9 guide RNAs targeting the  
614 first exon of the SOX17 gene were cloned into pX458 (Addgene 48138) and validated in HEK293T  
615 cells (ATCC CRL-3216) by the Transgenic Animal and Gene Editing core at CCHMC. The  
616 CRISPR targeted region was amplified with Phusion Polymerase (ThermoFisher; F531) and each  
617 amplicon was digested with T7 Endonuclease I (NEB; M0302S). Digested amplicons were run on  
618 agarose gels to quantify relative gRNA activity. **Nucleofection:** RNP complex assembly of the  
619 validated gRNA was performed by combining 20ug Alt-R® S.p. HiFi Cas9 Nuclease V3 (IDT;  
620 1081060) with 16ug sgRNA (Synthego) *in vitro* for 45 minutes at room temperature. The RNP  
621 complex was electroporated into parental iPS 72.3 cells using a Lonza 4D Nucleofector. Isolated  
622 clones were lysed and amplified using Phusion polymerase and clones of interest were submitted  
623 for Sanger sequencing to the CCHMC DNA Sequencing Core.

624

625 **Definitive Endoderm differentiation:** Confluent cells were passaged to single cells using  
626 Accutase (Sigma Aldrich; A6964) and plated on Matrigel-coated plates using mTESR1 and Y-  
627 27632 (StemCell Technologies, 72304). The following data, basal media was replaced, and cells  
628 were washed with PBS. DE differentiation was then carried out in RPMI-1640 media (Thermo  
629 Fisher; 11875-093) supplemented with non-essential amino acids (ThermoFisher; 11140050).  
630 Cells were treated with 100ng/ml Activin A (Shenandoah, 800-01) and 2um CHIR99021 (R&D  
631 Systems; 4423) for 24hrs. In the next two days, cells were treated with 100ng/ml Activin A and 2

632  $\mu\text{m}$  CHIR99021 in RPMI-1640 with increasing concentrations (0.2% on Day 2, 2% on Day 3) of  
633 ES-grade FBS (GE; SH30070.02). To identify Wnt-responsive genes, cells were treated with 1 $\mu\text{m}$   
634 of the Wnt inhibitor C59 (Tocris; 5148) at two different time points; for 3 days from the onset of  
635 differentiation (between Day 0 and Day 1) to identify ‘early’ Wnt regulated genes and on days 2  
636 and 3 to identify ‘late’ Wnt regulated genes.

637

638 **Neuromesodermal Progenitor differentiation:** Confluent cells were passaged using Accutase  
639 and plated on vitronectin coated plates using E8 and Y-27632. NMP differentiation was carried  
640 out largely as described previously<sup>55</sup>. Briefly, media was changed to Essential 6 Medium (Gibco;  
641 A1516401), 24 hours later cells were treated with 200ng/ml FGF8b (PeproTech; 100-25) in E6  
642 media. After a further 24 hours, cells were treated with 200ng/ml FGF8b and 3 $\mu\text{m}$  CHIR99021 in  
643 E6 media. To knock down SOX2 levels, the CRISPRi-SOX2 cells were treated with 1 $\mu\text{g/ml}$   
644 doxycycline (dox) on days 2 and 3 of differentiation. To identify Wnt regulated genes, NMP  
645 cultures were treated with either 3 $\mu\text{m}$  CHIR99021 or 1 $\mu\text{m}$  C59 on Day 3 of differentiation.

646

647 **mRNA Extraction. RT-qPCR and RNA-Seq:** Total RNA was extracted using the Nucleospin  
648 RNA Extraction kit (Machery-Nagel; 740955) and reverse-transcribed to cDNA using SuperScript  
649 VILO (ThermoFisher; 1177250) according to manufacturer’s instructions. qPCR was performed  
650 using PowerUp SYBR Green MasterMix (ThermoFisher; A25777) and QuantStudio 3 Flex Real-  
651 Time PCR system. Relative mRNA expression was normalized to that of housekeeping gene  
652 *PPIA* (peptidylprolyl isomerase A) and calculated using the  $\Delta\Delta\text{Ct}$  method. For RNA-Seq  
653 experiments, three biological replicates were sequenced per condition. 300ng of total RNA, as  
654 determined by Qubit High-Sensitivity spectrofluorometric measurement, was poly-A selected and  
655 reverse transcribed using Illumina’s TruSeq stranded mRNA library preparation kit (Illumina;  
656 20020595). Samples were incubated with unique Illumina-compatible adapters for multiplexing.  
657 After 15 cycles of amplification, libraries were paired end sequenced on a NovaSeq 6000 with a  
658 2x100 read length.

659

660 **Immunofluorescence:** Cells were plated at a density of 10,000 cells/ml on Matrigel or vitronectin  
661 coated Ibidi 8-well chamber slides (Ibidi; 80826). Cells were washed once with PBS and fixed in  
662 4% paraformaldehyde for 30 minutes at room temperature. If necessary, antigen retrieval was  
663 performed by adding 1x Citrate Buffer warmed to 55°C and incubating slides at 65°C for 45 mins.

664 Slides were then blocked with 5% normal donkey serum (NDS) for an hour. Primary antibodies  
665 were added in 5% NDS in PBS and incubated overnight at 4°C. The following day, cells were  
666 washed thrice in PBS and incubated with secondary antibodies and DAPI for an hour at room  
667 temperature. Slides were again washed in PBS before imaging. Images were taken using a Nikon  
668 A1R inverted confocal microscope and analyzed using NIS Elements (Nikon). Antibodies and  
669 dilutions used are listed in Supplementary Table 2.

670

671 **Cell Fractionation:** Nuclear isolation was performed as previously described<sup>87</sup>. Briefly, cells were  
672 dissociated using Accutase and counted using a Bio Rad TC20 Automated Cell Counter. 10  
673 million cells were then lysed in 1ml of cytoplasmic buffer (50mM Tris-HCl pH 7.5, 10% glycerol,  
674 0.5% Triton X-100, 137.5mM NaCl) supplemented with protease (ThermoFisher; A32953) and  
675 phosphatase (ThermoFisher; A32957) inhibitors and incubated on ice for 15min. Cells were then  
676 pelleted by centrifugation for 5 mins at 16,000 rpm at 4°C. Nuclei were then resuspended in 10mM  
677 HEPES pH 7.8, 0.5 M NaCl, 0.1% NP-40 supplemented with 1mM DTT and fresh  
678 protease/phosphatase inhibitors. Samples were sonicated for two 10s pulses on ice. Nuclei were  
679 cleared by centrifugation for 10mins at 16,000 rpm at 4°C.

680

681 **Co-immunoprecipitation:** CoIP assays were performed as previously described<sup>88</sup> with minor  
682 modifications. After differentiation to the desired stage, 20 million cells were washed on the plates  
683 with PBS and crosslinked with 1.5mM DSP (ThermoFisher; 22585) for 30 mins at room  
684 temperature. The crosslinking reaction was quenched by 30mM Tris pH 7.4 in PBS and incubated  
685 for 20 minutes. Cells were then scraped in ice-cold PBS supplemented with protease inhibitors  
686 and resuspended in 1ml cytoplasmic buffer (10mM HEPES pH 7.9, 10mM KCl, 340mM sucrose,  
687 3mM MgCl<sub>2</sub>, 10% glycerol, 0.1% TritonX-100) supplemented with 1mM DTT and fresh protease  
688 inhibitors. Cells were incubated on ice for 10 mins and centrifuged for 10 mins at 4000 rpm. The  
689 nuclear pellet was then resuspended in 500µl CoIP wash buffer (100mM NaCl, 25mM HEPES pH  
690 7.9, 1mM MgCl<sub>2</sub>, 0.2mM EDTA, 0.5% NP-40) supplemented with protease inhibitors. Samples  
691 were sonicated for two 10s pulses, treated with 600U/ml benzonase (Millipore; 70664) and  
692 incubated at 4°C with end over end rotation for 4 hrs. Afterwards, the concentration of NaCl in the  
693 samples was adjusted to 200mM and samples were incubated for an additional 30 mins. Nuclear  
694 extracts were then cleared by centrifuging for 30 minutes at max speed at 4°C. Nuclear lysates  
695 were then quantified by BCA assays and protein concentrations of the lysates were adjusted to

696 either 500ug/ml or 1mg/ml by diluting with CoIP wash buffer. Lysates were then precleared with  
697 Protein G Dynabeads (ThermoFisher; 10004D) at 4°C for an hour. 10% input samples were  
698 collected from the precleared lysates and stored at -20°C. Then samples were transferred to fresh  
699 tubes and incubated with relevant antibodies overnight at 4°C with end-over-end rotation. The  
700 following day, lysates and antibody complexes were added to precleared Protein-G Dynabeads  
701 and allowed to incubate at 4°C for 2 hrs with end-over-end rotation. The antibody/beads  
702 complexes were then washed with ice-cold CoIP wash buffer 8 times at 4°C. Lysates were then  
703 briefly centrifuged to remove any residual wash buffer and the beads were resuspended in 60µl  
704 2x LDS loading buffer (ThermoFisher; NP0007). Proteins were eluted from beads on a  
705 thermomixer at 65°C for 15 mins at 1000 rpm. Immunoprecipitations with antibody and IgG were  
706 performed parallelly. A list of antibodies and associated dilutions can be found in Supplementary  
707 Table 2.

708  
709 **Western Blots:** Nuclear lysates were quantified by BCA and equal concentrations of protein  
710 samples were loaded for all experiments. Samples were resuspended in 4x LDS loading buffer  
711 supplemented with fresh 100mM DTT and boiled for 10mins. Proteins were separated on 4-12%  
712 Bis-Tris or 7% Tris-Acetate gels and transferred to PVDF membranes. Membranes were blocked  
713 in LI-COR TBS Intercept Blocking Buffer (LiCor; 927-60001) for an hour and then incubated with  
714 primary antibodies overnight at 4°C. The next day, membranes were probed with relevant  
715 secondary antibodies and imaged on a LI-COR Odyssey Cix scanner and processed using LI-  
716 COR Image Studio Lite. A list of antibodies and associated dilutions can be found in  
717 Supplementary Table 2.

718  
719 **Transfections and Reporter Assays:** Putative SOX17-dependnent or TCF-dependent  
720 enhancers were synthesized (Genscript) and cloned into the pGL4.23 (*luc2/miniP*; Promega)  
721 vector. For transfections, hESCs were dissociated into 2-3 cell clumps using Versene and plated  
722 at a density of 60,000 cells/ml using mTESR and RevitaCell supplement (Gibco; A2644501). DE  
723 differentiations were carried out as described above. On the completion of day 2 of differentiation,  
724 cells were washed with PBS and supplemented with fresh day 3 differentiation media and  
725 incubated at 37°C for 30 mins. 50µl Opti-MEM (Gibco; 31985062), 1µl Lipofectamine STEM  
726 Transfection Reagent (Invitrogen; STEM00001) and 500 ng DNA (495ng enhancer/*luc*, 5ng  
727 Renilla) were then added to the cells and they were incubated for 24hrs at 37°C. The next day,

728 cells were washed with PBS, lysed and assayed using the Dual-Luciferase Assay System  
729 (Promega; E1910) according to manufacturer's instructions.

730

731 **ChIP-qPCR, ChIP-reChIP and ChIP-Seq:** Most ChIP experiments were performed in biological  
732 duplicates as in<sup>71</sup> with several modifications. After differentiation to the desired stage,  
733 approximately 20 million cells were dual crosslinked in plate, first with 1.5mM EGS  
734 (ThermoFisher; 21565) for 20 mins, followed by supplementation with 1% formaldehyde for an  
735 additional 20 minutes at room temperature. The crosslinking reaction was quenched with 125mM  
736 glycine for 15 minutes at room temperature. Cells were then washed twice and scraped in ice-  
737 cold PBS and if needed, flash frozen in dry ice until future use. ChIP samples were resuspended  
738 in 1ml sonication buffer (20mM HEPES pH 7.4, 150mM NaCl, 0.1% SDS, 1% Triton X-100, 1mM  
739 EDTA, 0.5mM EGTA) supplemented with fresh protease inhibitors. Chromatin was sonicated  
740 using a Diagenode Bioruptor Pico instrument for 45 cycles of 30 seconds ON, 60 seconds OFF,  
741 to generate 200-400 bp sheared fragments. Chromatin was then precleared with Protein G  
742 Dynabeads for an hour with end-over-end rotation at 4°C. A volume of the precleared chromatin  
743 corresponding to 1% of the total volume was set aside as input. The rest of the samples were  
744 transferred to fresh tubes containing preblocked Protein G Dynabeads; relevant antibodies (see  
745 Supplementary Table 2) were added and samples were incubated overnight at 4°C with end-over-  
746 end rotation. The next day, the beads were washed serially with 150mM salt wash buffer (20mM  
747 HEPES pH 7.4, 150mM NaCl, 0.1% SDS, 0.1% sodium deoxycholate, 1% Triton X-100, 1mM  
748 EDTA, 0.5 mM EGTA), 500mM salt wash buffer (20mM HEPES pH 7.4, 500mM NaCl, 0.1% SDS,  
749 0.1% sodium deoxycholate, 1% Triton X-100, 1mM EDTA, 0.5 mM EGTA), 1M salt wash buffer  
750 (20mM HEPES pH 7.4, 1M NaCl, 0.1% SDS, 0.1% sodium deoxycholate, 1% Triton X-100, 1mM  
751 EDTA, 0.5 mM EGTA), 2M salt wash buffer (20mM HEPES pH 7.4, 2M NaCl, 0.1% SDS, 0.1%  
752 sodium deoxycholate, 1% Triton X-100, 1mM EDTA, 0.5 mM EGTA) and LiCl wash buffer (20mM  
753 HEPES pH 7.4, 0.5M LiCl, 0.5% NP-40, 0.5% sodium deoxycholate, 1mM EDTA, 0.5 mM EGTA).  
754 Each wash buffer was supplemented with fresh 1mM DTT and protease inhibitors, and each wash  
755 was performed for 20 minutes at 4°C. The beads were then washed twice in 1xTE buffer  
756 supplemented with fresh protease inhibitors. The beads were then resuspended in DNA elution  
757 buffer (1% SDS, 0.1M NaHCO<sub>3</sub>). Elution was performed twice on a thermomixer at 65°C at 1,200  
758 rpm. Eluates from two rounds of elution were combined and supplemented with 1/10 volume of  
759 5M NaCl. Simultaneously, an equal volume of DNA elution buffer and 5M NaCl were added to the

760 input samples. All samples were reverse crosslinked overnight at 65°C. The following day,  
761 samples were treated with RNase A for an hour at 37°C and digested with Proteinase K for 2  
762 hours at 55°C. DNA was then purified using the Qiagen QIAquick Purification Kit (Qiagen; 28104)  
763 using manufacturer's instructions and eluted in 20µl Elution Buffer; 1µl was used to quantify DNA  
764 concentrations using a Qubit High-Sensitivity DS DNA Assay kit (Invitrogen; Q32851).

765 For ChIP-Seq experiments, DNA libraries were prepared using 1-5 ng of starting material  
766 using the SMARTer ThruPLEX DNA-Seq kit (Takara; R400674) according to manufacturer's  
767 instructions. After library amplification, DNA was purified using AMPure XP beads (Beckman-  
768 Coulter; A63880) and size-selected to retain 200-600 bp fragments. DNA fragment traces were  
769 analyzed on a Bioanalyzer. Suitable libraries were then paired-end sequenced on a Illumina  
770 NovaSeq 6000 with a 2x75 read length.

771 For ChIP-reChIP experiments, before the first ChIP, antibodies were crosslinked to Protein  
772 G Dynabeads. Briefly, beads were washed with 0.2M sodium borate pH9, and antibodies were  
773 crosslinked to beads by using 20mM DMP (Pierce; 21666) dissolved in 0.2M sodium borate. The  
774 crosslinking reaction was carried out at room temperature for 40 mins. The reaction was then  
775 quenched using 0.2M ethanolamine pH 8.0 for an hour. Residual IgGs were removed by washing  
776 the antibody/beads complex with 0.58%v/v acetic acid + 150mM NaCl. The beads were then  
777 added to processed chromatin samples and ChIP experiments were performed as described  
778 above. After the first ChIP, samples were eluted in DNA elution buffer supplemented with 10mM  
779 DTT. The samples were then diluted in 10 volumes of sonication buffer and the 2<sup>nd</sup> ChIP was  
780 carried out as described above. qPCR was performed using PowerUp SYBR Green MasterMix  
781 and the QuantStudio 3 Flex Real-Time PCR system using default protocols. Primers were  
782 designed to span relevant SOX17 or β-catenin peak centers and relative expression was  
783 normalized to that of a 'negative' control gene desert genomic region. Relative fold change was  
784 calculated using the  $\Delta\Delta C_t$  method. Primer sequences are listed in Supplementary Table 2.

785  
786 **ATAC-Seq:** ATAC-Seq experiments were largely performed as previously described<sup>89</sup>. Briefly,  
787 50,000 cells were collected following differentiation to the desired stage, and lysed in 50µl of  
788 ATAC-lysis buffer (10mM Tris-HCl, pH 7.4. 10mM NaCl, 3mM MgCl<sub>2</sub>, 0.1% NP-40) to obtain a  
789 crude nuclei prep. All centrifugation steps were performed at 4°C at 2000 rpm. The nuclei pellet  
790 was then resuspended in the 50ul of the transposition reaction mix (25ul Tagment DNA buffer,  
791 2.5ul TD Tn5 Transposase enzyme, 22.5ul nuclease-free water) (Illumina; 20034197). The

792 transposition reaction was incubated at 37°C for 30 min on a thermomixer with constant gentle  
793 shaking at 1000 rpm. Immediately after transposition, DNA was purified using a Qiagen MinElute  
794 PCR Purification (Qiagen; 28004 kit) and eluted in 10µl Elution Buffer. The eluted DNA was then  
795 amplified in a reaction with 25µl NEBNext High-Fidelity 2x PCR Mastermix (NEB; M0541L) and  
796 custom 25µm Nextera PCR Primers (Ad1\_noMx universal primer, 0.5µm Ad2.x indexing primer).  
797 PCR was performed as follows: 1 cycle of 72°C for 5min, 98°C for 30s, 5 cycles of 98°C for 10s,  
798 63°C for 30s, 72°C for 1min. 5ul of the amplified DNA was then used to perform qPCR to  
799 determine the optimal number of additional cycles to prevent amplification saturation of DNA  
800 libraries. In all cases, either 4 or 5 additional cycles of PCR was performed at: 98°C for 10s, 63°C  
801 for 30s and 72°C for 1 min. Double size selection of amplified libraries (0.5x – left sided, 1.8x –  
802 right sided) was performed using AMPure XP beads and the DNA was eluted in a final volume of  
803 20ul in 0.1x TE buffer. Purified libraries were sequenced on an Illumina NextSeq 500 instrument  
804 with a 2x75bp read length.

805

806 **Statistics and Reproducibility:** RNA-Seq experiments were performed in biological triplicates.  
807 Most ChIP-Seq and ATAC-Seq experiments were performed in biological duplicates except for  
808 H3K27ac and BRG1 ChIP-Seq (n = 1) and NMP β-catenin ChIP-Seq (n = 3). A description of all  
809 datasets generated in this study can be found in Supplementary Table 1. Immunostaining and  
810 western blots were performed at least four times and representative images were used. CoIP,  
811 ChIP-qPCR experiments and reporter assays were repeated at least thrice. All differentiations  
812 and experiments were performed using cell lines maintained between passages 55 – 65. To  
813 validate that CHIR-dependent target genes were indeed Wnt regulated, we also performed  
814 differentiation of iPSCs replacing CHIR99021 with recombinant WNT3A (R&D; 5036-WN) and  
815 validated the expression of several target genes by qPCR and β-catenin and SOX17 binding by  
816 ChIP-qPCR.

817

## 818 **Data Analysis**

819 **RNA-Seq:** Raw reads were quality-checked using FASTQC  
820 (<https://www.bioinformatics.babraham.ac.uk/projects/fastqc/>) and if necessary, adapters were  
821 trimmed using cutadapt<sup>90</sup>. Fastq files were pseudo-aligned to the hg19 reference index using  
822 salmon<sup>91</sup>. An index of transcripts was built using default parameters (salmon index) using quasi-  
823 mapping (-quasi) and kmers of length 31 (-k 31). Relative transcript abundance was then

824 quantified using salmon -quant using paired end fastq files and counts per transcript were  
825 obtained. The tximport package<sup>92</sup> was then used for downstream analysis to convert transcript-  
826 level counts to gene-level estimates. Differential gene expression analysis was performed using  
827 DESeq2<sup>93</sup> using default parameters. Differentially expressed genes were defined as those with  
828 log<sub>2</sub> fold change >|1| and adjusted FDR of p<0.05. Transcripts were then annotated using the  
829 biomaRt<sup>94</sup> package. Any genes with TPM less than 10 across all replicates were then discarded  
830 from further analysis. To perform principal component analysis, variance stabilized and  
831 transformed data from DESeq2 *vst* function was generated. PCA plots were visualized using  
832 *plotPCA* () function of DESeq2.

833 To identify endoderm, mesoderm or ectoderm enriched genes, we reanalyzed the  
834 following datasets: GSM1112846, GSM1112844 (RNA-Seq of Day 3 ectoderm cells) and  
835 GSM1112835, GSM1112833 (RNA-Seq of Day 3 mesoderm cells) and compared with our Day 3  
836 endoderm RNA-Seq data. Raw RNA-Seq data was downloaded from GEO and processed as  
837 described above, and pairwise differential gene expression analysis was performed using  
838 DESeq2 to identify genes with enriched expression in Day 3 endoderm, mesoderm or ectoderm.  
839 For instance, a gene was considered to be significantly endoderm enriched if: the gene was  
840 significantly differentially expressed in endoderm over control pluripotent cells, and showed  
841 significantly enriched expression in the endoderm compared to the mesoderm and ectoderm  
842 datasets. Differential enrichment threshold: log<sub>2</sub> fold change >|1| and adjusted FDR of p<0.05.

843  
844 **ChIP-Seq:** Raw reads were quality-checked using FASTQC and adapters were trimmed using  
845 cutadapt. Reads were aligned to the hg19 genome using bowtie2<sup>95</sup>. Unmapped and low quality  
846 (MAPQ<10) reads were discarded. Duplicates were marked using Picard  
847 (<https://broadinstitute.github.io/picard/>) and removed using samtools<sup>96</sup>. From the replicate  
848 datasets, a consensus set of peaks were called for each TF at each stage using HOMER<sup>97</sup>  
849 *getDifferentialPeaksReplicates.pl* using stage-matched input samples as background and -style  
850 factor. Briefly, first tag directories were created for each target and input replicate. Peaks were  
851 quantified for both target and input tag directories and DESeq2 was then invoked to identify peaks  
852 enriched in target ChIP samples over input using a fold enrichment threshold of 1.5 and fdr of 0.1.  
853 In the absence of replicates, peak calling was performed using macs2<sup>98</sup> using *-call-summits* and  
854 a *qvalue* cutoff of 0.05. HOMER *annotatePeaks.pl* was then used to annotate these peaks.

855 Differential binding analysis was performed using the DiffBind package<sup>99,100</sup> using default  
856 parameters. Differentially bound  $\beta$ -catenin and ATAC peaks were identified using a fold

857 enrichment threshold of 1.5 and adjusted  $-p$ -value  $< 0.05$ . A genomic site was defined as both  
858 'SOX17' and TCF' bound if: a significant binding event was called for both SOX17 and at least  
859 one of the TCF/LEF TFs using the relevant input sample as background, and no statistically  
860 significant differential binding between TFs was observed. A peak was called 'SOX17 enriched'  
861 if: the peak was called for only SOX17 and none of the TCFs, or if SOX17 binding displayed a  
862 greater log<sub>2</sub> fold change over input relative to all the TCFs, and SOX17 was determined to have  
863 significantly increased binding over all TCFs quantified by DiffBind and DESeq2. Similarly, a  
864 genomic site was called 'TCF-enriched' if a peak was called for at least one of the TCFs but not  
865 SOX17, or at least one of the TCFs was determined to have significantly increased binding over  
866 SOX17. A fold enrichment threshold of 1.5 and FDR  $< 0.1$  to identify SOX vs. TCF enriched peaks,  
867 in order to also incorporate weakly bound TCF peaks. If a binding category contained less than  
868 500 peaks, we didn't use it for further analysis.

869

870 **ATAC-Seq:** FASTQ files were quality-checked using FASTQC and Nextera adapters were  
871 trimmed using cutadapt. Trimmed paired-end reads were aligned to the hg19 genome using  
872 bowtie2 and the parameters  $-X 2000$   $-very-sensitive-local$ . Paired end bam files were filtered for  
873 mitochondrial reads, unmapped and low-quality reads. Duplicates were marked using Picard and  
874 removed using samtools. Peaks were called on replicates using Genrich  
875 (<https://github.com/jsh58/Genrich>) and the parameters  $j -r -e -v -q 0.1$

876

877 **Nucleoatac analysis:** As input for nucleoatac analysis, peak files of desired categories were  
878 extended upto 2000bp across peak summits. Nucleoatac<sup>49</sup> was run using default parameters. For  
879 visualization and quantification of nucleosome occupancy, the occ.bedgraph files were converted  
880 to bigwigs using UCSC binary tools (<https://hgdownload.cse.ucsc.edu/admin/exe/>). Nucleosome  
881 occupancy scores were then computed using deeptools<sup>101</sup> computeMatrix and visualized using  
882 plotProfile.

883

884 **Downstream data processing and visualization:** To visualize ChIP-Seq and ATAC-seq data,  
885 filtered and sorted bam files were converted to bigwig files using deeptools bamCoverage with  
886 the parameters:  $-bS 20$   $-smoothLength 60$   $-e 200$   $-normalizeUsing RPGC$  using the effective  
887 genome size for GRCh37. Bigwig files were visualized using IGV<sup>102</sup>. Genomic algebra operations  
888 were performed using unix commands (awk, grep, sed) or using the bedtools suite<sup>103</sup>, particularly  
889 bedtools intersect to define overlapping genomic region of interest, or bedtools merge to define a

890 union set of genomic regions. For all quantifications, merged bam files or bigwig files of both CHIP  
891 or ATAC replicates were used.

892 To identify patterns in  $\beta$ -catenin time course CHIP-Seq datasets [Fig1, S1], an union of all  $\beta$ -  
893 catenin peaks from all days was plotted using deeptools plotHeatmap and k-means clustering  
894 was performed using kclust 8. The most predominant 5 clusters were then extracted and retained  
895 for further analysis. Heatmaps, density plots or metaplots were generated using the deeptools  
896 package by invoking the computeMatrix (-reference-point center, -a 2500, -b 2500) and then  
897 plotHeatmap or plotProfile options. Volcano plots or MA plots of differential gene expression were  
898 generated using the EnhancedVolcano (<https://github.com/kevinblighe/EnhancedVolcano>) or  
899 ggpubr (<https://github.com/kassambara/ggpubr>) packages in R respectively. Heatmaps from  
900 RNA-Seq data was generated using the 'pheatmap' package.

901 Signal normalization (1/mapped tags/ sample such that each directory contains 10 million  
902 tags) and quantification was performed on merged CHIP/ATAC tag directories by HOMER.  
903 Boxplots and violin plots of CHIP/ATAC-Seq signal quantification were generated using the  
904 ggplot2 package and statistically significant differences in read density between conditions was  
905 determined by ANOVA or Wilcoxon rank sum test as appropriate in R. UpSET plots of the  
906 distribution of SOX17 or SOX2 and  $\beta$ -catenin co-regulated enhancers were generated using  
907 *intervene*<sup>104</sup>. Data from CHIP-qPCR and reporter assays were visualized using GraphPad Prism.  
908 P-values were determined via nonparametric Mann-Whitney-U tests.

909  
910 **DNA-binding Motif and GO enrichment Analysis:** The MEME-Suite of tools<sup>105,106</sup> was used to  
911 perform *de-novo* motif analysis. For motif analysis, 100bp across peak summits were extracted  
912 for each category and converted to the fasta format using bedtools getfasta. *De-novo* motif  
913 analysis across peak sets was performed using DREME and default parameters, and motifs were  
914 identified using TOMTOM. Motif scanning at putative SOX17 or TCF-dependent enhancers for  
915 reporter assays was performed using FIMO with default parameters using the CIS-BP<sup>107</sup> 'Homo  
916 sapiens' database as reference. GO term enrichment analysis was performed using GREAT<sup>108</sup>  
917 and Gene Ontology<sup>109,110</sup>.

918  
919 **Analysis of public data:** The following public datasets were reanalyzed as described above:  
920 GSM772971 (H3K4me1 CHIP-Seq in DE), GSM1112846, GSM1112844 (RNA-Seq of Day 3  
921 ectoderm cells) and GSM1112835, GSM1112833 (RNA-Seq of Day 3 mesoderm cells)<sup>43</sup>.

922

923 **REFERENCES:**

- 924 1. Nusse, R. & Clevers, H. Wnt/ $\beta$ -Catenin Signaling, Disease, and Emerging Therapeutic  
925 Modalities. *Cell* **169**, 985–999 (2017).
- 926 2. Ng, L. F. *et al.* WNT Signaling in Disease. *Cells* **8**, (2019).
- 927 3. Söderholm, S. & Cantù, C. The WNT/ $\beta$ -catenin dependent transcription: A tissue-specific  
928 business. *WIREs Mech. Dis.* **13**, e1511 (2021).
- 929 4. Masuda, T. & Ishitani, T. JB Special Review—Wnt Signaling: Biological Functions and Its  
930 Implications in Diseases Context-dependent regulation of the  $\beta$ -catenin transcriptional  
931 complex supports diverse functions of Wnt/ $\beta$ -catenin signaling. doi:10.1093/jb/mvw072
- 932 5. Valenta, T., Hausmann, G. & Basler, K. The many faces and functions of  $\beta$ -catenin.  
933 *EMBO J.* **31**, 2714–36 (2012).
- 934 6. Lien, W.-H. & Fuchs, E. Wnt some lose some: transcriptional governance of stem cells by  
935 Wnt/ $\beta$ -catenin signaling. doi:10.1101/gad.244772.114
- 936 7. Nakamura, Y., de Paiva Alves, E., Veenstra, G. J. C. & Hoppler, S. Tissue- and stage-  
937 specific Wnt target gene expression is controlled subsequent to  $\beta$ -catenin recruitment to  
938 cis-regulatory modules. *Development* **143**, 1914–1925 (2016).
- 939 8. Mosimann, C., Hausmann, G. & Basler, K.  $\beta$ -Catenin hits chromatin: Regulation of Wnt  
940 target gene activation. *Nat. Rev. Mol. Cell Biol.* **10**, 276–286 (2009).
- 941 9. Fiedler, M. *et al.* An ancient Pygo-dependent Wnt enhanceosome integrated by  
942 Chip/LDB-SSDP. *Elife* **4**, (2015).
- 943 10. Tienen, L. M. Van, Mieszczynek, J., Fiedler, M., Rutherford, T. J. & Bienz, M. Constitutive  
944 scaffolding of multiple Wnt enhanceosome components by Legless / . 1–23 (2017).  
945 doi:10.7554/eLife.20882
- 946 11. Gammons, M. & Bienz, M. Multiprotein complexes governing Wnt signal transduction.  
947 *Curr. Opin. Cell Biol.* **51**, 42–49 (2018).
- 948 12. Cadigan, K. M. & Waterman, M. L. TCF/LEFs and Wnt Signaling in the Nucleus. *Cold  
949 Spring Harb. Perspect. Biol.* **4**, a007906–a007906 (2012).
- 950 13. Gottardi, C. J. & Gumbiner, B. M. Distinct molecular forms of beta-catenin are targeted to  
951 adhesive or transcriptional complexes. *J. Cell Biol.* **167**, 339–49 (2004).
- 952 14. Moreira, S. *et al.* A Single TCF Transcription Factor, Regardless of Its Activation  
953 Capacity, Is Sufficient for Effective Trilineage Differentiation of ESCs. *Cell Rep.* **20**, 2424–  
954 2438 (2017).
- 955 15. Gerner-Mauro, K. N., Akiyama, H. & Chen, J. Redundant and additive functions of the  
956 four Lef/Tcf transcription factors in lung epithelial progenitors. *Proc. Natl. Acad. Sci. U. S.  
957 A.* **117**, 12182–12191 (2020).
- 958 16. Blassberg, R. *et al.* Sox2 levels configure the WNT response of epiblast progenitors  
959 responsible for vertebrate body formation. *bioRxiv* 2020.12.29.424684 (2020).  
960 doi:10.1101/2020.12.29.424684
- 961 17. Guo, Q. *et al.* A  $\beta$ -catenin-driven switch in TCF/LEF transcription factor binding to DNA  
962 target sites promotes commitment of mammalian nephron progenitor cells. *Elife* **10**,  
963 (2021).
- 964 18. Weise, A. *et al.* Alternative splicing of Tcf712 transcripts generates protein variants with  
965 differential promoter-binding and transcriptional activation properties at Wnt/ $\beta$ -catenin  
966 targets. *Nucleic Acids Res.* **38**, 1964–81 (2010).
- 967 19. Kelly, K. F. *et al.*  $\beta$ -Catenin Enhances Oct-4 Activity and Reinforces Pluripotency through  
968 a TCF-Independent Mechanism. *Cell Stem Cell* **8**, 214–227 (2011).
- 969 20. Funayama, N. S. *et al.*  $\beta$ -Catenin Regulates Primitive Streak Induction through Collaborative  
970 Interactions with SMAD2/SMAD3 and OCT4. *Cell Stem Cell* **16**, 639–652 (2015).

- 971 21. Kaidi, A., Williams, A. C. & Paraskeva, C. Interaction between beta-catenin and HIF-1  
972 promotes cellular adaptation to hypoxia. *Nat. Cell Biol.* **9**, 210–7 (2007).
- 973 22. Zimmerli, D. *et al.* TBX3 acts as tissue-specific component of the Wnt/ $\beta$ -catenin  
974 transcriptional complex. *Elife* **9**, (2020).
- 975 23. Lefebvre, V., Dumitriu, B., Penzo-Méndez, A., Han, Y. & Pallavi, B. Control of cell fate  
976 and differentiation by Sry-related high-mobility-group box (Sox) transcription factors. *Int.*  
977 *J. Biochem. Cell Biol.* **39**, 2195–214 (2007).
- 978 24. Bernard, P. & Harley, V. R. Acquisition of SOX transcription factor specificity through  
979 protein-protein interaction, modulation of Wnt signalling and post-translational  
980 modification. *Int. J. Biochem. Cell Biol.* **42**, 400–10 (2010).
- 981 25. Badis, G. *et al.* Diversity and Complexity in DNA Recognition by Transcription Factors.  
982 *Science (80-. )*. **324**, 1720–1723 (2009).
- 983 26. Sinner, D. *et al.* Sox17 and Sox4 Differentially Regulate  $\beta$ -Catenin/T-Cell Factor Activity  
984 and Proliferation of Colon Carcinoma Cells. *Mol. Cell. Biol.* **27**, 7802–7815 (2007).
- 985 27. Sinner, D. Sox17 and  $\beta$ -catenin cooperate to regulate the transcription of endodermal  
986 genes. *Development* **131**, 3069–3080 (2004).
- 987 28. Kormish, J. D., Sinner, D. & Zorn, A. M. Interactions between SOX factors and Wnt/beta-  
988 catenin signaling in development and disease. *Dev. Dyn.* **239**, 56–68 (2010).
- 989 29. Zorn, A. M. *et al.* Regulation of Wnt signaling by Sox proteins: XSox17 alpha/beta and  
990 XSox3 physically interact with beta-catenin. *Mol. Cell* **4**, 487–98 (1999).
- 991 30. Zhou, D. *et al.* SOX10 is a novel oncogene in hepatocellular carcinoma through Wnt/ $\beta$ -  
992 catenin/TCF4 cascade. *Tumour Biol.* **35**, 9935–40 (2014).
- 993 31. Akiyama, H. *et al.* Interactions between Sox9 and beta-catenin control chondrocyte  
994 differentiation. *Genes Dev.* **18**, 1072–87 (2004).
- 995 32. Corada, M. *et al.* Fine-Tuning of Sox17 and Canonical Wnt Coordinates the Permeability  
996 Properties of the Blood-Brain Barrier. *Circ. Res.* **124**, 511–525 (2019).
- 997 33. Moradi, A. *et al.* The cross-regulation between SOX15 and Wnt signaling pathway. *J.*  
998 *Cell. Physiol.* **232**, 3221–3225 (2017).
- 999 34. Bhattaram, P. *et al.* SOXC proteins amplify canonical WNT signaling to secure  
1000 nonchondrocytic fates in skeletogenesis. *J. Cell Biol.* **207**, 657–671 (2014).
- 1001 35. Hagey, D. W. & Muhr, J. Sox2 Acts in a Dose-Dependent Fashion to Regulate  
1002 Proliferation of Cortical Progenitors. *Cell Rep.* **9**, 1908–1920 (2014).
- 1003 36. Mukherjee, S. *et al.* Sox17 and  $\beta$ -catenin co-occupy Wnt-responsive enhancers to govern  
1004 the endoderm gene regulatory network. *Elife* **9**, (2020).
- 1005 37. Hoffmeyer, K., Junghans, D., Kanzler, B. & Kemler, R. Trimethylation and Acetylation of  
1006  $\beta$ -Catenin at Lysine 49 Represent Key Elements in ESC Pluripotency. *Cell Rep.* **18**,  
1007 2815–2824 (2017).
- 1008 38. Chen, T. & Dent, S. Y. R. Chromatin modifiers and remodellers: regulators of cellular  
1009 differentiation. *Nat. Rev. Genet.* **15**, 93–106 (2014).
- 1010 39. Zhang, X., Peterson, K. A., Liu, X. S., McMahon, A. P. & Ohba, S. Gene Regulatory  
1011 Networks Mediating Canonical Wnt Signal-Directed Control of Pluripotency and  
1012 Differentiation in Embryo Stem Cells. *Stem Cells* **31**, 2667–2679 (2013).
- 1013 40. Wu, C.-I. *et al.* Function of Wnt/ $\beta$ -catenin in counteracting Tcf3 repression through the  
1014 Tcf3- $\beta$ -catenin interaction. *Development* **139**, 2118–29 (2012).
- 1015 41. Yi, F. *et al.* Opposing effects of Tcf3 and Tcf1 control Wnt stimulation of embryonic stem  
1016 cell self-renewal. *Nat. Cell Biol.* **13**, 762–70 (2011).
- 1017 42. Zorn, A. M. & Wells, J. M. Vertebrate Endoderm Development and Organ Formation.  
1018 *Annu. Rev. Cell Dev. Biol.* **25**, 221–51 (2009).

- 1019 43. Gifford, C. A. *et al.* Transcriptional and Epigenetic Dynamics during Specification of  
1020 Human Embryonic Stem Cells. *Cell* **153**, 1149–1163 (2013).
- 1021 44. Calo, E. & Wysocka, J. Modification of Enhancer Chromatin: What, How, and Why? *Mol.*  
1022 *Cell* **49**, 825–837 (2013).
- 1023 45. Soufi, A. *et al.* Pioneer Transcription Factors Target Partial DNA Motifs on Nucleosomes  
1024 to Initiate Reprogramming. *Cell* **161**, 555–568 (2015).
- 1025 46. Vanzan, L. *et al.* High throughput screening identifies SOX2 as a super pioneer factor  
1026 that inhibits DNA methylation maintenance at its binding sites. *Nat. Commun.* **12**, 3337  
1027 (2021).
- 1028 47. Dodonova, S. O., Zhu, F., Dienemann, C., Taipale, J. & Cramer, P. Nucleosome-bound  
1029 SOX2 and SOX11 structures elucidate pioneer factor function. *Nature* **580**, 669–672  
1030 (2020).
- 1031 48. Meers, M. P., Janssens, D. H., Meers, M. P., Janssens, D. H. & Henikoff, S. Pioneer  
1032 Factor-Nucleosome Binding Events during Article Pioneer Factor-Nucleosome Binding  
1033 Events during Differentiation Are Motif Encoded. *Mol. Cell* 1–14 (2019).  
1034 doi:10.1016/j.molcel.2019.05.025
- 1035 49. Schep, A. N. *et al.* Structured nucleosome fingerprints enable high-resolution mapping of  
1036 chromatin architecture within regulatory regions. *Genome Res.* **25**, 1757–70 (2015).
- 1037 50. Creyghton, M. P. *et al.* Histone H3K27ac separates active from poised enhancers and  
1038 predicts developmental state. *Proc. Natl. Acad. Sci. U. S. A.* **107**, 21931–6 (2010).
- 1039 51. Gouti, M. *et al.* In Vitro Generation of Neuromesodermal Progenitors Reveals Distinct  
1040 Roles for Wnt Signalling in the Specification of Spinal Cord and Paraxial Mesoderm  
1041 Identity. *PLoS Biol.* **12**, e1001937 (2014).
- 1042 52. Tsakiridis, A. *et al.* Distinct Wnt-driven primitive streak-like populations reflect in vivo  
1043 lineage precursors. *Development* **141**, 1209–21 (2014).
- 1044 53. Koch, F. *et al.* Antagonistic Activities of Sox2 and Brachyury Control the Fate Choice of  
1045 Neuro-Mesodermal Progenitors. *Dev. Cell* **42**, 514-526.e7 (2017).
- 1046 54. Mandegar, M. A. *et al.* CRISPR Interference Efficiently Induces Specific and Reversible  
1047 Gene Silencing in Human iPSCs. *Cell Stem Cell* **18**, 541–53 (2016).
- 1048 55. Lippmann, E. S. *et al.* Stem Cell Reports Article Deterministic HOX Patterning in Human  
1049 Pluripotent Stem Cell-Derived Neuroectoderm. *Stem Cell Reports* **4**, 632–644 (2015).
- 1050 56. Nair, S. & Schilling, T. F. Chemokine signaling controls endodermal migration during  
1051 zebrafish gastrulation. *Science* **322**, 89–92 (2008).
- 1052 57. Loh, K. M. *et al.* Efficient endoderm induction from human pluripotent stem cells by  
1053 logically directing signals controlling lineage bifurcations. *Cell Stem Cell* **14**, 237–252  
1054 (2014).
- 1055 58. Jostes, S. V. *et al.* Unique and redundant roles of SOX2 and SOX17 in regulating the  
1056 germ cell tumor fate. *Int. J. Cancer* **146**, 1592–1605 (2020).
- 1057 59. Fujimura, N. *et al.* Wnt-mediated down-regulation of Sp1 target genes by a transcriptional  
1058 repressor Sp5. *J. Biol. Chem.* **282**, 1225–37 (2007).
- 1059 60. Angonin, D. & Van Raay, T. J. Nkd1 functions as a passive antagonist of Wnt signaling.  
1060 *PLoS One* **8**, e74666 (2013).
- 1061 61. Barker, N. *et al.* The chromatin remodelling factor Brg-1 interacts with b -catenin to  
1062 promote target gene activation. **20**, 4935–4943 (2001).
- 1063 62. Holik, A. Z. *et al.* Brg1 Loss Attenuates Aberrant Wnt-Signalling and Prevents Wnt-  
1064 Dependent Tumourigenesis in the Murine Small Intestine. *PLoS Genet.* **10**, e1004453  
1065 (2014).
- 1066 63. Kagey, M. H. *et al.* Mediator and cohesin connect gene expression and chromatin  
1067 architecture. *Nature* **467**, 430–5 (2010).

- 1068 64. Kim, S., Xu, X., Hecht, A. & Boyer, T. G. Mediator Is a Transducer of Wnt/ $\beta$ -Catenin  
1069 Signaling. *J. Biol. Chem.* **281**, 14066–14075 (2006).
- 1070 65. Ghiselli, G., Coffee, N., Munnery, C. E., Koratkar, R. & Siracusa, L. D. The cohesin SMC3  
1071 is a target for the  $\beta$ -catenin/TCF4 transactivation pathway. *J. Biol. Chem.* **278**, 20259–  
1072 67 (2003).
- 1073 66. Hecht, A. The p300/CBP acetyltransferases function as transcriptional coactivators of  
1074  $\beta$ -catenin in vertebrates. *EMBO J.* **19**, 1839–1850 (2000).
- 1075 67. Estarás, C., Benner, C. & Jones, K. A. SMADs and YAP compete to control elongation of  
1076  $\beta$ -catenin:LEF-1-recruited RNAPII during hESC differentiation. *Mol. Cell* **58**, 780–93  
1077 (2015).
- 1078 68. Kramps, T. *et al.* Wnt/Wingless Signaling Requires BCL9/Legless-Mediated Recruitment  
1079 of Pygopus to the Nuclear  $\beta$ -Catenin-TCF Complex. *Cell* **109**, 47–60 (2002).
- 1080 69. Carrera, I., Janody, F., Leeds, N., Duveau, F. & Treisman, J. E. Pygopus activates  
1081 Wingless target gene transcription through the mediator complex subunits Med12 and  
1082 Med13. *Proc. Natl. Acad. Sci.* **105**, 6644–6649 (2008).
- 1083 70. Andrews, P. G. P. & Kao, K. R. Wnt/ $\beta$ -catenin-dependent acetylation of Pygo2 by  
1084 CBP/p300 histone acetyltransferase family members. doi:10.1042/BCJ20160590
- 1085 71. Schuijers, J., Mokry, M., Hatzis, P., Cuppen, E. & Clevers, H. Wnt-induced transcriptional  
1086 activation is exclusively mediated by TCF/LEF. *EMBO J.* **33**, 146–156 (2014).
- 1087 72. Doumpas, N. *et al.* TCF / LEF dependent and independent transcriptional regulation of  
1088 Wnt/ $\beta$ -catenin target genes. *EMBO J.* **38**, (2019).
- 1089 73. Hou, L., Srivastava, Y. & Jauch, R. Molecular basis for the genome engagement by Sox  
1090 proteins. *Semin. Cell Dev. Biol.* **63**, 2–12 (2017).
- 1091 74. Kondoh, H. & Kamachi, Y. SOX-partner code for cell specification: Regulatory target  
1092 selection and underlying molecular mechanisms. *Int. J. Biochem. Cell Biol.* **42**, 391–9  
1093 (2010).
- 1094 75. Zhang, X., Peterson, K. A., Liu, X. S., McMahon, A. P. & Ohba, S. Gene Regulatory  
1095 Networks Mediating Canonical Wnt Signal-Directed Control of Pluripotency and  
1096 Differentiation in Embryo Stem Cells. *Stem Cells* **31**, 2667–2679 (2013).
- 1097 76. Aksoy, I. *et al.* Oct4 switches partnering from Sox2 to Sox17 to reinterpret the enhancer  
1098 code and specify endoderm. *EMBO J.* **32**, 938–953 (2013).
- 1099 77. Aksoy, I. *et al.* Sox Transcription Factors Require Selective Interactions with Oct4 and  
1100 Specific Transactivation Functions to Mediate Reprogramming. *Stem Cells* **31**, 2632–  
1101 2646 (2013).
- 1102 78. Howard, L., Rex, M., Clements, D. & Woodland, H. R. Regulation of the *Xenopus*  
1103 *Xsox17 $\alpha$ 1* promoter by co-operating VegT and Sox17 sites. *Dev. Biol.* **310**, 402 (2007).
- 1104 79. Heslop, J. A., Pournasr, B., Liu, J.-T. & Duncan, S. A. GATA6 defines endoderm fate by  
1105 controlling chromatin accessibility during differentiation of human-induced pluripotent  
1106 stem cells. *Cell Rep.* **35**, 109145 (2021).
- 1107 80. Iyer, L. M. *et al.* A context-specific cardiac  $\beta$ -catenin and GATA4 interaction influences  
1108 TCF7L2 occupancy and remodels chromatin driving disease progression in the adult  
1109 heart. *Nucleic Acids Res.* **46**, 2850–2867 (2018).
- 1110 81. Trompouki, E. *et al.* Lineage regulators direct BMP and Wnt pathways to cell-specific  
1111 programs during differentiation and regeneration. *Cell* **147**, 577–89 (2011).
- 1112 82. Kessler, R., Hausmann, G. & Basler, K. The PHD domain is required to link *Drosophila*  
1113 Pygopus to Legless/ $\beta$ -catenin and not to histone H3. *Mech. Dev.* **126**, 752–9 (2009).
- 1114 83. Yano, F. *et al.* The canonical Wnt signaling pathway promotes chondrocyte differentiation  
1115 in a Sox9-dependent manner. *Biochem. Biophys. Res. Commun.* **333**, 1300–1308 (2005).
- 1116 84. Lu, L. *et al.* Kdm2a/b Lysine Demethylases Regulate Canonical Wnt Signaling by

- 1117 Modulating the Stability of Nuclear  $\beta$ -Catenin. *Dev. Cell* **33**, 660–674 (2015).  
1118 85. Zhao, T. *et al.* SOX7 is associated with the suppression of human glioma by HMG-box  
1119 dependent regulation of Wnt/ $\beta$ -catenin signaling. *Cancer Lett.* **375**, 100–107 (2016).  
1120 86. Angelozzi, M. & Lefebvre, V. SOXopathies: Growing Family of Developmental Disorders  
1121 Due to SOX Mutations. *Trends Genet.* **35**, 658–671 (2019).  
1122 87. Sierra, R. A. *et al.* TCF7L1 suppresses primitive streak gene expression to support  
1123 human embryonic stem cell pluripotency. *Development* **145**, (2018).  
1124 88. Cattoglio, C., Pustova, I., Darzacq, X., Tjian, R. & Hansen, A. S. Assessing Self-  
1125 interaction of Mammalian Nuclear Proteins by Co-immunoprecipitation. *Bio-protocol* **10**,  
1126 e3526 (2020).  
1127 89. Buenrostro, J. D., Wu, B., Chang, H. Y. & Greenleaf, W. J. ATAC-seq: A Method for  
1128 Assaying Chromatin Accessibility Genome-Wide. *Curr. Protoc. Mol. Biol.* **109**, 21.29.1-  
1129 21.29.9 (2015).  
1130 90. Martin, M. Cutadapt removes adapter sequences from high-throughput sequencing  
1131 reads. *EMBnet.journal* **17**, 10 (2011).  
1132 91. Patro, R., Duggal, G., Love, M. I., Irizarry, R. A. & Kingsford, C. Salmon provides fast and  
1133 bias-aware quantification of transcript expression. *Nat. Methods* **14**, 417–419 (2017).  
1134 92. Soneson, C., Love, M. I. & Robinson, M. D. Differential analyses for RNA-seq: transcript-  
1135 level estimates improve gene-level inferences. *F1000Research* **4**, 1521 (2015).  
1136 93. Love, M. I., Huber, W. & Anders, S. Moderated estimation of fold change and dispersion  
1137 for RNA-seq data with DESeq2. *Genome Biol.* **15**, 550 (2014).  
1138 94. Durinck, S., Spellman, P. T., Birney, E. & Huber, W. Mapping identifiers for the integration  
1139 of genomic datasets with the R/Bioconductor package biomaRt. *Nat. Protoc.* **4**, 1184–91  
1140 (2009).  
1141 95. Langmead, B. & Salzberg, S. L. Fast gapped-read alignment with Bowtie 2. *Nat. Methods*  
1142 **9**, 357–9 (2012).  
1143 96. Li, H. *et al.* The Sequence Alignment/Map format and SAMtools. *Bioinformatics* **25**,  
1144 2078–2079 (2009).  
1145 97. Berest, I. *et al.* Quantification of Differential Transcription Factor Activity and Multiomics-  
1146 Based Classification into Activators and Repressors: diffTF. *Cell Rep.* **29**, 3147-3159.e12  
1147 (2019).  
1148 98. Zhang, Y. *et al.* Model-based Analysis of ChIP-Seq (MACS). *Genome Biol.* **9**, R137  
1149 (2008).  
1150 99. Stark, R. & Brown, G. *DiffBind: Differential binding analysis of ChIP-Seq peak data.*  
1151 100. Ross-Innes, C. S. *et al.* Differential oestrogen receptor binding is associated with clinical  
1152 outcome in breast cancer. *Nature* **481**, 389–393 (2012).  
1153 101. Ramírez, F. *et al.* deepTools2: a next generation web server for deep-sequencing data  
1154 analysis. *Nucleic Acids Res.* **44**, W160-5 (2016).  
1155 102. Thorvaldsdottir, H., Robinson, J. T. & Mesirov, J. P. Integrative Genomics Viewer (IGV):  
1156 high-performance genomics data visualization and exploration. *Brief. Bioinform.* **14**, 178–  
1157 192 (2013).  
1158 103. Quinlan, A. R. & Hall, I. M. BEDTools: a flexible suite of utilities for comparing genomic  
1159 features. *Bioinformatics* **26**, 841–842 (2010).  
1160 104. Khan, A. & Mathelier, A. Intervene: a tool for intersection and visualization of multiple  
1161 gene or genomic region sets. *BMC Bioinformatics* **18**, 287 (2017).  
1162 105. Bailey, T. L. *et al.* MEME SUITE: tools for motif discovery and searching. *Nucleic Acids*  
1163 *Res.* **37**, W202-8 (2009).  
1164 106. Machanick, P. & Bailey, T. L. MEME-ChIP: motif analysis of large DNA datasets.  
1165 *Bioinformatics* **27**, 1696–7 (2011).

- 1166 107. Weirauch, M. T. *et al.* Determination and inference of eukaryotic transcription factor  
1167 sequence specificity. *Cell* **158**, 1431–1443 (2014).  
1168 108. McLean, C. Y. *et al.* GREAT improves functional interpretation of cis-regulatory regions.  
1169 *Nat. Biotechnol.* **28**, 495–501 (2010).  
1170 109. Ashburner, M. *et al.* Gene Ontology: tool for the unification of biology. *Nat. Genet.* **25**, 25–  
1171 29 (2000).  
1172 110. Gene Ontology Consortium. The Gene Ontology resource: enriching a GOld mine.  
1173 *Nucleic Acids Res.* **49**, D325–D334 (2021).  
1174

**Figure 1**



**Figure 1. Dynamic chromatin binding of  $\beta$ -catenin during DE differentiation.** **A.** Schematic of definitive endoderm differentiation. **B.** Immunostaining of nuclear K49ac ‘active’ and SOX17 at days 0 - 3 (scale bar = 20 and 50  $\mu$ m respectively) **C.** Density plot of  $\beta$ -catenin ChIP-seq showing five categories of temporally distinct peaks. **E.** Overlap of Wnt regulated genes with genes associated with  $\beta$ -catenin bound peaks. \*Significant overlap based on hypergeometric test, day 1:  $p = 4.75 \times 10^{-105}$ ; day 2:  $p = 3.63 \times 10^{-138}$ ; day 3:  $p = 2.52 \times 10^{-48}$ . **D.** Schematic of  $\beta$ -catenin peak dynamics during differentiation. **F – J.** Genome browser tracks showing  $\beta$ -catenin chromatin binding for each of the five categories of peaks. **K – O.** Average normalized  $\beta$ -catenin (purple) and ATAC-Seq (green) read density, plotted as a line graph. Error bars represent standard error of mean for each category.

## Figure 2



**Figure 2. Dynamic co-localization of  $\beta$ -catenin with SOX17 and TCFs.** **A.** RNA-seq expression levels of *SOX17*, *TCF7*, *TCF7L1*, *TCF7L2* and *LEF1* during endoderm differentiation. **B – D.** Venn diagrams showing peak overlap of  $\beta$ -catenin, TCFs, and SOX17 during each day of endoderm differentiation. \*Significant overlap based on hypergeometric test,  $p < 0.0001$ . **E.** ChIP-seq density plots showing  $\beta$ -catenin, TCF and SOX17 co-occupancy on Day 3 at four categories of loci: All Day 3  $\beta$ -catenin peaks,  $\beta$ -catenin/SOX17/TCF cobound peaks,  $\beta$ -catenin/SOX17 only peaks,  $\beta$ -catenin/TCF only peaks. **F.** Stacked bar graph plotting the percentage peak overlap of  $\beta$ -catenin with TCFs and/or SOX17. **G – I.** Representative genome browser views of genes associated with co-binding of  $\beta$ -catenin with SOX17 and TCF (**G**),  $\beta$ -catenin and SOX17 only (**H**) and  $\beta$ -catenin and TCF only (**I**) peaks. **J – M.** Scatter plots showing fold enrichment and proportion of peaks containing SOX or TCF DNA-binding motifs in different categories of  $\beta$ -catenin peaks across differentiation.

### Figure 3



**Figure 3. SOX17 is required for  $\beta$ -catenin recruitment to chromatin in the absence of TCFs. A-C**  $\beta$ -catenin ChIP-seq density plots and metaplots of the average signal intensity for three distinct categories of peaks: **A.**  $\beta$ -catenin peaks lost in SOX17KO cell, **B.**  $\beta$ -catenin peaks that remain unchanged between WT and SOX17KO cells and **C.** new  $\beta$ -catenin peaks gained in SOX17KO cells. The tables below each density plot show the percentage of peaks bound by  $\beta$ -catenin, SOX17 or any TCF. **D – F.** Genome browser view showing  $\beta$ -catenin and TCF7L2 chromatin occupancy in WT and SOX17KO cells at representative loci for each category of peaks. **G – H.** Integration of  $\beta$ -catenin and SOX17 RNA-Seq and ChIP-Seq datasets from Day 3 defining direct co-regulated genes. \* Significant overlap based on hypergeometric test, ChIP-Seq peak overlap:  $p = 1.03 \times 10^{-553}$ ; RNA-Seq gene set overlap:  $p = 2.07 \times 10^{-61}$ . **I.** Diagram showing percentage of SOX17/ $\beta$ -catenin coregulated peaks that are also co-bound by TCFs or not. **J.** ChIP-seq metaplots showing the average peak intensity for SOX17,  $\beta$ -catenin, TCF7, TCF7L1, TCF7L2 and LEF1 at both categories of SOX17/ $\beta$ -catenin coregulated peaks: SOX17/ $\beta$ -catenin only (purple) and SOX17/ $\beta$ -catenin/TCF cobound peaks (orange).

**Figure 4**

Chromatin accessibility of  $\beta$ -CAT peaks lost in SOX17 KO [n = 3020]



**Figure 4. Chromatin accessibility only partially accounts for loss of  $\beta$ -catenin binding in SOX17 KO cells.**

**A.** Density plots showing ATAC-Seq signal intensity in WT and SOX17KO cells for two classes of SOX17-dependent  $\beta$ -catenin bound peaks. Class I peaks with reduced accessibility and Class II enhancers which loose  $\beta$ -catenin in SOX17 KO cells but accessibility is unchanged. **B.** Metaplots showing nucleosome occupancy signals and **C.** quantification of ATAC-Seq read densities in WT (purple) and SOX17KO (pink) cells for both Class I and Class II enhancers. **D.** Metaplots showing the average H3K27ac ChIP-seq signal for Class I and Class II enhancers and **E.** violin plots quantifying tag density. Indicated p-values were determined by Wilcoxon rank sum test. **F.** Genome browser view of representative Class I and Class II enhancers. **G.** Bar graph showing the proportion of Class I and Class II enhancers associated with Wnt regulated, SOX17 regulated and SOX17/Wnt coregulated genes. Fisher's exact test, comparing proportion of Class I vs. Class II enhancers associated with regulation.  $p = 0.88$  for Wnt regulated genes,  $p = 0.472$  for SOX17 regulated genes,  $p = 0.02$  for SOX17/Wnt coregulated genes. Background is all genes in the genome. **H.** Schematic of SOX17 and  $\beta$ -catenin recruitment to Class I and Class II Wnt responsive enhancers (WRE).

## Figure 5



**Figure 5. SOX2 is required for  $\beta$ -catenin chromatin recruitment in neuromesodermal progenitors. A.** schematic of neuromesodermal progenitor (NMPs) differentiation with SOX2KD CRISPRi induction by dox. **B.** Immunostaining for SOX2, TBXT and active  $\beta$ -catenin protein levels in WT and SOX2KD cells on Day 3 of NMP differentiation. **C-D.**  $\beta$ -catenin ChP-seq density plots and metaplots of the average signal intensity at  $\beta$ -catenin peaks that are **C.** lost in SOX2KD cells and at **D.** peaks that remain unchanged in WT and SOX2KD cells (D). The table shows the percentage of peaks that were bound  $\beta$ -catenin, SOX2 or TCF (either TCF7L1, LEF1 or both) for each category in WT or SOX2KD cells. **E.** Integration of  $\beta$ -catenin and SOX2 RNA-Seq and ChIP-Seq datasets. \*Significant overlap based on hypergeometric test,  $\beta$ -catenin and SOX2 ChIP-Seq peak overlap:  $p = 1.07 \times 10^{-459}$ ; WNT and SOX2 regulated genes sets from RNA-Seq:  $p = 5.64 \times 10^{-352}$ . **F-G.** ATAC-Seq nucleosome occupancy signal showing **F.** loci that lost  $\beta$ -catenin peaks or **G.**  $\beta$ -catenin peaks unchanged in SOX2KD. **H-I.** Violin plots quantifying ATAC-Seq read densities at **H.** loci that lose  $\beta$ -catenin peaks in SOX2KD or **I.** loci where  $\beta$ -catenin peaks were unchanged in SOX2KD. **J.** Representative genome browser views of loci that lost  $\beta$ -catenin or remain unchanged in WT and SOX2KD cells. **K.** Schematic summarizing SOX2 and WNT/ $\beta$ -catenin interactions during NMP specification.

**Figure 6**



**Figure 6. SOX17 can recruit a  $\beta$ -catenin transcriptional complex to Wnt-responsive enhancers without TCFs.** **A – B.** Schematic of enhancer luciferase constructs containing either wild type (WT) sequences or with SOX (blue) or TCF (orange) DNA-binding sites mutated. Histogram showing average luciferase reporter activity of **A.** SOX17-dependent or **B.** TCF-dependent enhancers in wild type (WT) cells, C59 treated Wnt inhibited cells (-WNT) or SOX17KO (-SOX17) cells. Statistical differences were determined between WT and  $\Delta$ SOX17 enhancers in WT cells, WT enhancers in WT and -WNT cells, and WT enhancers in WT and -SOX17 cells by two-tailed student's T-test. ns = not significant, \* =  $p < 0.05$ , \*\* =  $p < 0.01$ , \*\*\* =  $p < 0.001$ . **C-D.** Western blots showing the presence of interacting partners followed by co-immunoprecipitation of **C.** SOX17 and **D.**  $\beta$ -catenin. **E.** ChIP-reChIP-qPCR, showing the relative fold change in chromatin recovery with  $\beta$ -catenin ChIP followed by a second reChIP with either SOX17, TCF7L2 or IgG at SOX-dependent (*CXCR4* and *SALL1*) or TCF-dependent (*SP5* and *NKD1*) enhancers. **F-G** BRG1 ChIP-seq in WT (purple) and SOX17KO (pink) cells. **F.** Metaplots showing the average peak intensity at loci with SOX17-dependent  $\beta$ -catenin binding which are not bound by TCFs. **G.** violin plots quantifying BRG1 read intensity of peaks in F. Wilcoxon rank sum test,  $p < 2.2 \times 10^{-16}$ . **H – K.** ChIP-qPCR of p300 (H), SMC1 (I), BCL9 (J) and PYGO2 (K) showing relative fold change chromatin binding at SOX-dependent or TCF-dependent enhancers. Two-tailed student's T-test. ns = not significant, \* =  $p < 0.05$ , \*\* =  $p < 0.01$ , \*\*\* =  $p < 0.001$ . **L.** Model depicting SOX17-dependent assembly of a Wnt-responsive transcription complex at TCF-independent endodermal enhancers.

## Figure S1 - Related to Figure 1



**Figure S1 – Related to Figure 1. Characterization of  $\beta$ -catenin chromatin binding during DE differentiation.** **A.** Immunostaining showing total  $\beta$ -catenin across days (d) 0 – 3 of differentiation (scale bar = 20  $\mu$ m). **B.** Western blots of nuclear extracts showing total  $\beta$ -catenin, SOX17 and TBP (loading control) protein levels. **C - G.** GO enrichment analysis of five clusters of  $\beta$ -catenin bound genomic regions: common peaks (**C**), Day 1 specific peaks (**D**), Day 2 specific peaks (**E**), Days 2 -3 specific peaks (**F**) and Day 3 specific peaks (**G**). For each category, the most enriched GO terms and the adjusted  $-\log_{10}$  p-values (Fisher's exact test, FDR 5%) are shown. **H – L.** Quantification of  $\beta$ -catenin ChIP-Seq read densities of each category for each day. **M – Q.** Quantification of ATAC-Seq read densities. Dotted lines represent the approximate read density corresponding to the peak calling threshold. **H – K.** Statistical significance between read density of groups was determined by one-way ANOVA followed by multiple comparison via Tukey's post-hoc honestly significant difference and results are available at Supplementary Table 3.  $p < 0.05$  was considered significant in all cases. **R – V.** Bar graphs showing the percentage of  $\beta$ -catenin peaks that overlap with 'open' ATAC-Seq peaks for each category at each day.

## Figure S2 - Related to Figure 1



**Figure S2 – Related to Figure 1. Dynamic Wnt-responsive genes during DE differentiation. A.** Schematic showing different conditions and timings of CHIR and C59 treatment to identify Wnt regulated genes. **B.** principal component analysis (PCA) plot showing distribution of CHIR-treated (+WNT) and C59-treated (-Wnt) RNA-seq samples during endoderm differentiation, relative to day 3 mesoderm and ectoderm differentiation. **C - E** Differential expression analysis of +WNT versus -WNT samples ( $\log_2$  fold change  $>1$ ,  $p < 0.05$ ) to identify Wnt-responsive transcripts at days 1, 2 and 3 of differentiation. **F – I.** Relative expression levels of direct  $\beta$ -catenin bound and Wnt activated genes plotted as a *loess* smoothed trendline (individual transcript data is shown in light grey) for the following categories: common genes bound and regulated by  $\beta$ -catenin on all days of differentiation (**F**), Day 1 specific genes (**G**), Day 2 specific genes (**H**) and Day 3 specific genes (**I**) and GO enrichment analysis of each category.

**Figure S3 - Related to Figure 2**



**G**

| All D3 β-CATpeaks, n = 11717        |                                                                                          |          |         |
|-------------------------------------|------------------------------------------------------------------------------------------|----------|---------|
| Rank                                | Motif                                                                                    | q-val    | % peaks |
| 1.                                  |  GATA | 2.28e-01 | 70      |
| 2.                                  |  TCF  | 5.57e-04 | 32.4    |
| 3.                                  |  SOX  | 4.62e-02 | 37      |
| D3 β-CAT/SOX17 only peaks, n = 4224 |                                                                                          |          |         |
| Rank                                | Motif                                                                                    | q-val    | % peaks |
| 1.                                  |  GATA | 2.00e-04 | 73      |
| 2.                                  |  TBX  | 6.16e-03 | 10      |
| 3.                                  |  SOX  | 1.45e-02 | 12.6    |
| D3 β-CAT/TCF only peaks, n = 1187   |                                                                                          |          |         |
| Rank                                | Motif                                                                                    | q-val    | % peaks |
| 1.                                  |  GATA | 6.77e-03 | 35.8    |
| 2.                                  |  TCF  | 4.6e-04  | 21.7    |
| 3.                                  |  FOXA | 1.92e-03 | 5.98    |
| D3 β-CAT/SOX17/TCF peaks, n = 5544  |                                                                                          |          |         |
| Rank                                | Motif                                                                                    | q-val    | % peaks |
| 1.                                  |  GATA | 8.18e-06 | 33.7    |
| 2.                                  |  TCF  | 3.12e-05 | 17.8    |
| 3.                                  |  FOXA | 3.51e-04 | 9.9     |

**Figure S3 – Related to Figure 2. Differential co-occupancy of  $\beta$ -catenin, SOX17 and TCFs in DE. A – F.** Quantification of ChIP-seq tag density for  $\beta$ -catenin (**A**), SOX17 (**B**), TCF7L2 (**C**), TCF7 (**D**), TCF7L1 (**E**) and LEF1 (**F**) at the following peak categories: All  $\beta$ -catenin peaks, peaks bound only by  $\beta$ -catenin and TCF. Peaks co-bound by  $\beta$ -catenin, SOX17 and at least one TCF, peaks bound by  $\beta$ -catenin and SOX17 but not TCFs. Dotted lines represent the approximate read density corresponding to the peak calling threshold. **G.** *De-novo* DNA-binding motif analyses of the above-described peak categories.

## Figure S4 - Related to Figure 3



**Figure S4 – Related to Figure 3. Characterization of SOX17 KO cells and identification of SOX17 regulated transcripts.** **A.** Schematic showing the CRISPR-Cas9 targeting strategy to generate the homozygous mutant SOX17 knockout (KO) line. **B.** Immunostaining showing expression of endoderm markers SOX17 and FOXA2 in WT and SOX17KO cells (scale bar = 100  $\mu$ m). **C.** Immunostaining of total and active  $\beta$ -catenin protein levels in WT and SOX17KO cells (scale bar = 50  $\mu$ m). **D.** RNA-seq expression levels (log<sub>2</sub> transformed TPM) of *TCF7*, *TCF7L1*, *TCF7L2* and *LEF1* in WT and SOX17KO cells. \*\*\*p= 0.0002, non-parametric Mann-Whitney U tests. Not significant (ns). **E.** Western blots and **F.** immunostaining showing protein expression levels of TCF7, TCF7L1, TCF7L2 and LEF1 in WT and SOX17KO cells (scalebar = 100  $\mu$ m). **G.** Volcano plot showing differentially expressed genes between WT and SOX17KO (Log<sub>2</sub> foldchange >1, p< 0.05). **H– I.** Most enriched GO terms associated with SOX17 activated and SOX17 repressed genes and the adjusted -log<sub>10</sub> transformed p-values (Fisher's exact test, FDR 5%). **J.** RNA-seq expression levels (log<sub>2</sub> transformed TPM) of exemplar mesoderm markers in WT and SOX17KO cells. P-values were calculated via the non-parametric Mann Whitney U test. **K.** Immunostaining of mesoderm marker TBX6 in WT and SOX17KO cells (scale bar = 100  $\mu$ m).

**Figure S5 Related to Figure 4**



**I**

| $\beta$ -catenin peaks lost in SOX17KO, n = 4337    |       |               |          |       |                                  |       |
|-----------------------------------------------------|-------|---------------|----------|-------|----------------------------------|-------|
| Rank                                                | Motif | <i>p</i> -val | % peaks  | GO:BP | $-\log_{10} p$ adj.              |       |
| 1.                                                  |       | GATA          | 7.97e-03 | 48.8  | • primary germ layer formation   | 6.10  |
| 2.                                                  |       | SOX           | 8.27e-07 | 76.8  | • digestive tract morphogenesis  | 5.03  |
| 3.                                                  |       | FOXA          | 5.65e-04 | 17.6  | • pancreatic differentiation     | 3.49  |
| unchanged $\beta$ -catenin, n = 3894                |       |               |          |       |                                  |       |
| Rank                                                | Motif | <i>p</i> -val | % peaks  | GO:BP | $-\log_{10} p$ adj.              |       |
| 1.                                                  |       | GATA          | 8.93e-03 | 57.4  | • endothelial tube morphogenesis | 5.69  |
| 2.                                                  |       | TCF           | 1.09e-03 | 33.3  | • sprouting angiogenesis         | 4.53  |
| 3.                                                  |       | TBX           | 5.15e-04 | 34.8  | • VEGF signaling pathway         | 4.13  |
| $\beta$ -catenin peaks gained in SOX17KO, n = 24096 |       |               |          |       |                                  |       |
| Rank                                                | Motif | <i>p</i> -val | % peaks  | GO:BP | $-\log_{10} p$ adj.              |       |
| 1.                                                  |       | GATA          | 4.57e-03 | 85.1  | • cardiac septum morphogenesis   | 75.38 |
| 2.                                                  |       | TCF           | 4.31e-06 | 24.0  | • E-M transition                 | 42.26 |
| 3.                                                  |       | SMAD          | 2.11e-04 | 31.5  | • catenin import into nucleus    | 22.44 |

**Figure S5 – Related to Figure 3. Differential  $\beta$ -catenin ChIP-seq peaks in WT and SOX17 KO cells. A.**

Volcano plot showing distribution of differential  $\beta$ -catenin binding events in WT and SOX17KO (fold change >1.5, FDR  $p < 0.05$ ). Brown dots represent  $\beta$ -catenin peaks lost in SOX17KO, blue dots are  $\beta$ -catenin peaks gained in SOX17KO, and orange dots are  $\beta$ -catenin peaks that did not change. **B - D.** Quantification of  $\beta$ -catenin ChIP-seq density of each of the above-described categories in WT and SOX17KO cells plotted as boxplots. P values were calculated via the Wilcoxon rank sum test. **E – H.** Violin plots quantifying TCF7, TCF7L1, TCF7L2 and LEF1 ChIP-seq read densities at loci bound  $\beta$ -catenin for each of the above categories in WT and SOX17KO cells. P values calculated by Wilcoxon rank sum test comparing WT and SOX17KO cells. **I.** *De-novo* DNA-binding motif analysis and GO term enrichment of genes associated with  $\beta$ -catenin peaks in each category.

**Figure S6 - Related to Figure 3**



**Figure S6 – Related to Figure 3. Analysis of genes co-regulated by SOX17 and WNT/  $\beta$ -catenin. A.**

Heatmap showing unsupervised clustering of RNA-seq expression for all genes cobound and coregulated by SOX17 and  $\beta$ -catenin in wild type, C59 treated (-Wnt) or SOX17KO Day 3 DE cells. **B.** UpSET plot showing distribution of SOX17/ $\beta$ -catenin coregulated genes that are also associated with co-bound enhancers, indicating whether a gene is activated (act) or repressed (rep) by SOX17 or WNT. **C.** Stacked bar graphs showing the percentage of genes associated with SOX17/  $\beta$ -catenin coregulated peaks that have enriched expressed in the endoderm (yellow), mesoderm (orange) or ectoderm (blue) peaks. Day 3 endoderm, mesoderm or ectoderm enriched genes were defined by re-analysis of the following datasets: GSM1112846, GSM1112844 (RNA-Seq of Day 3 ectoderm cells) and GSM1112835, GSM1112833 (RNA-Seq of Day 3 mesoderm cells) **D.** H3K4me1 (data analyzed from GSM772971) and H3K27ac ChIP-Seq density plots of 1670 loci cobound and coregulated by SOX17/  $\beta$ -catenin from Fig. 3G. **E.** Quantification of ChIP-seq read density for SOX17,  $\beta$ -catenin, TCF7, TCF7L1, TCF7L2 and LEF1 binding to loci that are occupied only by SOX17/  $\beta$ -catenin but not any TCF (pink) and loci occupied by co-occupied by SOX17,  $\beta$ -catenin and at least one TCF. P values were calculated via the Wilcoxon rank sum test. Dotted lines represent the approximate read density corresponding to the peak calling threshold. **F.** Schematic summarizing SOX17 and WNT/ $\beta$ -catenin interactions during endoderm differentiation.

**Figure S7 - Related to Figure 4**



**Figure S7 – Related to Figure 4. ATAC-seq and epigenetic analysis of  $\beta$ -catenin bound loci.** **A.** Volcano plot showing differential SOX17-dependent chromatin accessibility in WT and SOX17KO cells (fold change > 1.5, FDR  $p < 0.05$ ) **B.** Bar graph showing the proportion of genes associated with SOX17-dependent  $\beta$ -catenin chromatin binding and are not bound by TCFs, that have Wnt-regulated and/or SOX17-regulated expression. Background is all genes in the genome. \*\*  $p = 9.8 \times 10^{-208}$  for Wnt regulated genes,  $p = 6.26 \times 10^{-187}$  for SOX17 regulated genes,  $p < 2.2 \times 10^{-16}$  for SOX17/Wnt coregulated genes, Fisher's exact test. **C.** Density plot of ATAC-seq signal for  $\beta$ -catenin peaks unchanged in SOX17KO. **D.** ATAC-seq metaplot showing average nucleosome occupancy signal at unchanged  $\beta$ -catenin peaks and **E.** quantification of ATAC-Seq read densities. **F.** Metaplots showing averages H3K27ac ChIP-seq signal at loci with unchanged  $\beta$ -catenin peaks and **G.** quantification of H3K27ac signal intensity as boxplots in WT and SOX17KO cells. P values calculated by the Wilcoxon rank sum test. **H.** Density plot of ATAC-seq signal for loci that gain  $\beta$ -catenin peaks in SOX17KO cells. Heatmaps showing ATAC signal intensity of two classes of new  $\beta$ -catenin peaks; those that gain accessibility in SOX17KO cells and those where accessibility is unchanged in both WT and SOX17KO. **I.** Metaplot of nucleosome occupancy signal showing average nucleosome occupancy and **J.** quantification of ATAC-Seq signal at both classes of *de-novo*  $\beta$ -catenin enhancers. **K.** Metaplot and **L.** quantification of H3K27ac ChIP-seq read intensity. P values were calculated via the Wilcoxon rank sum test.

## Figure S8 - Related to Figure 5



**Figure S8 – Related to Figure 5. Identification of SOX2-regulated and WNT-regulated genes in NMPs. A.**

Identification of SOX2-regulated transcripts. Volcano plot showing differential gene expression (log<sub>2</sub> fold change >1, FDR p<0.05) upon CRISPR-mediated SOX2 knockdown (KD). **B – C.** GO term enrichment analysis of SOX2 activated and repressed genes. **D.** Identification of WNT-regulated transcripts in NMPs. MA-plot showing differential gene expression comparing Day3 NMPs differentiated with CHIR or C59 to inhibit WNT. **E – F.** Enriched GO terms associated with Wnt activated (Act) and Wnt repressed (Rep) genes, -log<sub>10</sub> transformed p-values (Fisher's exact test, FDR 5%). **G.** Immunostaining showing TCF7, TCF7L1, TCF7L2, LEF1 and total β-catenin protein levels in WT and SOX2KD cells. (scalebar = 50 μm). **H.** RNA-seq expression levels (log<sub>2</sub> TPM) of *TCF7*, *TCF7L1*, *TCF7L2* and *LEF1* in WT and SOX2KD cells. P-values were determined by two-tailed student's T-test. **I.** Bar graph showing the proportion of genes associated β-catenin peaks lost in SOX2KD that also have Wnt-regulated, SOX2-regulated and SOX2/Wnt-coregulated expression. Fisher's exact test,  $p = 0.473$  (ns) for Wnt regulated genes,  $p = 8.76 \times 10^{-29}$  for SOX2 regulated genes,  $p = 7.10 \times 10^{-29}$  for SOX2/Wnt coregulated genes. **J.** UpSET plot showing distribution of coregulated β-catenin and SOX2 enhancers.

**Figure S9. Related to Figure 5**



**Figure S9 – Related to Figure 5. Analysis of SOX2-dependent  $\beta$ -catenin chromatin binding.** **A.** Volcano plot showing distribution of differentially bound  $\beta$ -catenin ChIP-seq peaks in WT versus SOX2KD cells (fold change  $>1.5$ ,  $p < 0.05$ ). **B – C.** Quantification of  $\beta$ -catenin ChIP-seq read densities in WT and SOX2KD cells at loci that either lose  $\beta$ -catenin (B) or where  $\beta$ -catenin binding is unchanged in SOX2KD. P-values were calculated via the Wilcoxon rank sum test. **D – E.** Quantification of TCF7L1 and LEF1 ChIP-seq read densities at both categories of peaks. P-values were calculated via the Wilcoxon rank sum test. Dotted lines represent the approximate read density corresponding to the peak calling threshold. **F.** Table showing *de-novo* DNA-binding motif analysis and GO term enrichment analysis of  $\beta$ -catenin peaks that are lost or unchanged in SOX2KD NMPs. **G.** Volcano plot showing differentially accessible peaks as determined by ATAC-Seq in WT and SOX2KD cells (fold change  $>1.5$ ,  $p < 0.05$ ).

**Figure S10 - Related to Figure 6**



**Figure S10 – Related to Figure 6. Analysis of enhancer complex components. A.** Western blot confirming SOX17KO does not disrupt TCF7L2 and  $\beta$ -catenin binding in co-immunoprecipitation. **B.** SOX17 ChIP-reChIP assays. Representative qPCR showing relative fold DNA recovery following either SOX17 ChIP-qPCR or ChIP-reChIP with  $\beta$ -catenin at SOX-dependent or TCF-independent enhancers. **C.** RNA-seq expression levels ( $\log_2$ TPM) of Wnt-enhanceosome components or epigenetic interactors of  $\beta$ -catenin in WT and SOX17KO cells. ns = not significant in two-tailed student's T-test. **D – E.** ChIP-qPCR of MED12 and NIPBL showing relative DNA recovery at SOX-dependent or TCF-dependent enhancers. \* =  $p < 0.05$ , \*\* =  $p < 0.01$ , \*\*\* =  $p < 0.001$  based on two-tailed student's T-test.
